# Supplementary material for: Staudinger/aza-Wittig reaction to accessNβ-protected amino alkyl isothiocyanates
Source: Royal Society of Chemistry journal article supplement (doi:10.1039/c8ob01061g), 2018-01-01
Supplement: c8ob01061g1.pdf [file c8ob01061g1.pdf]

## **Staudinger/aza-Wittig reaction to access $N\beta$ -protected amino alkyl isothiocyanates**

L. Santhosh, S. Durgamma, Shekharappa and Vommina V. Sureshbabu\*

---

*# 109, Peptide Research Laboratory, Department of Studies in Chemistry,  
Central College Campus, Dr. B. R. Ambedkar Veedhi, Bangalore University,  
Bangalore-560001, India.  
E-mail: sureshbabuvommina@rediffmail.com,  
hariccb@gmail.com*

---

### **Supporting information**

#### **Table of Contents**

- S3.....<sup>1</sup>H NMR Spectrum and <sup>13</sup>C NMR Spectrum of 2a**
- S4.....<sup>1</sup>H NMR Spectrum and <sup>13</sup>C NMR Spectrum of 2b**
- S5.....<sup>1</sup>H NMR Spectrum and <sup>13</sup>C NMR Spectrum of 2c**
- S6.....<sup>1</sup>H NMR Spectrum and <sup>13</sup>C NMR Spectrum of 2d**
- S7.....<sup>1</sup>H NMR Spectrum and <sup>13</sup>C NMR Spectrum of 2e**
- S8.....<sup>1</sup>H NMR Spectrum and <sup>13</sup>C NMR Spectrum of 2f**
- S9.....<sup>1</sup>H NMR Spectrum and <sup>13</sup>C NMR Spectrum of 2g**
- S10.....<sup>1</sup>H NMR Spectrum and <sup>13</sup>C NMR Spectrum of 2h**
- S11.....<sup>1</sup>H NMR Spectrum and <sup>13</sup>C NMR Spectrum of 2i**
- S12.....<sup>1</sup>H NMR Spectrum and <sup>13</sup>C NMR Spectrum of 2j**
- S13.....<sup>1</sup>H NMR Spectrum and <sup>13</sup>C NMR Spectrum of 2k**
- S14.....<sup>1</sup>H NMR Spectrum and <sup>13</sup>C NMR Spectrum of 2l**

**S15.....<sup>1</sup>H NMR Spectrum and <sup>13</sup>C NMR Spectrum of 2m**

**S16.....<sup>1</sup>H NMR Spectrum and <sup>13</sup>C NMR Spectrum of 2n**

**S17.....<sup>1</sup>H NMR Spectrum and <sup>13</sup>C NMR Spectrum of 2o**

**S18.....<sup>1</sup>H NMR Spectrum and <sup>13</sup>C NMR Spectrum of 2p**

**S19.....<sup>1</sup>H NMR Spectrum and <sup>13</sup>C NMR Spectrum of 3a**

**S20.....<sup>1</sup>H NMR Spectrum and <sup>13</sup>C NMR Spectrum of 3a\***

**S21..... RP-HPLC Chromatograms of 3a and 3a\* and their equimolar mixture**

**S22-S26..... RP-HPLC Chromatograms of 2a-p**

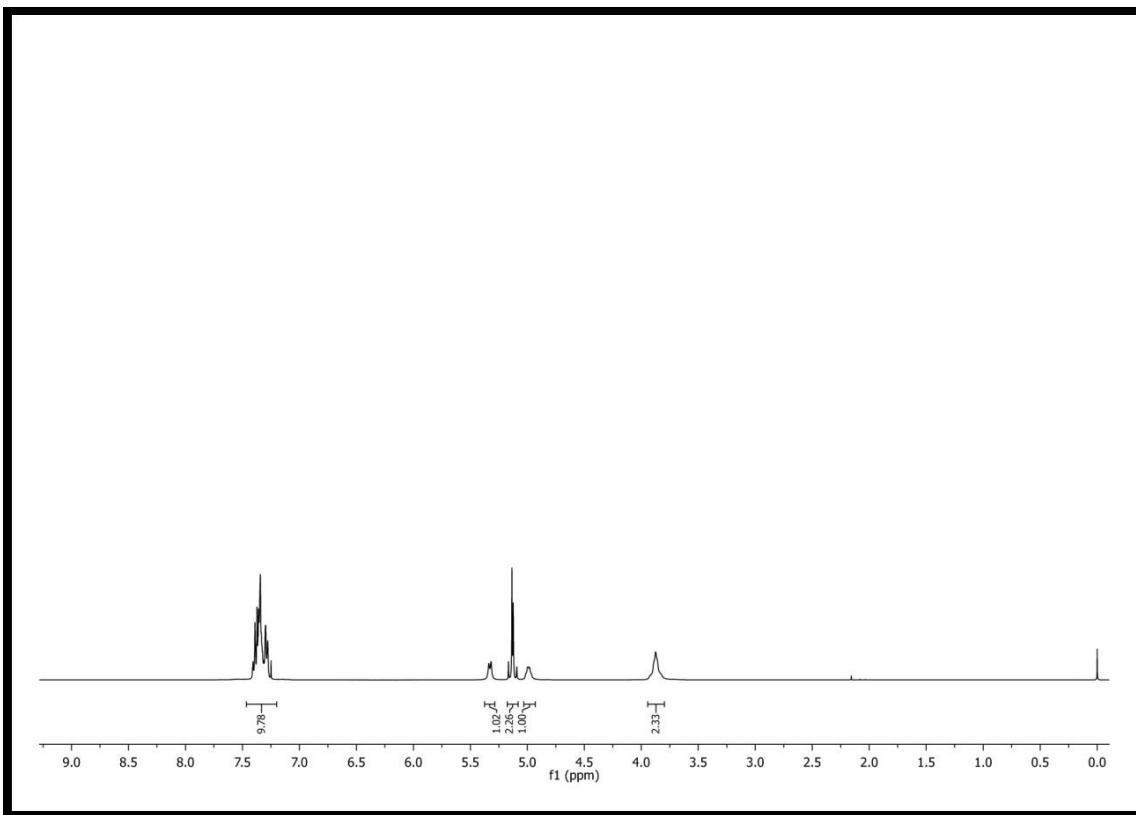

$^1\text{H}$  NMR Spectrum of Cbz-phg- $\psi$ [CH<sub>2</sub>NCS], 2a

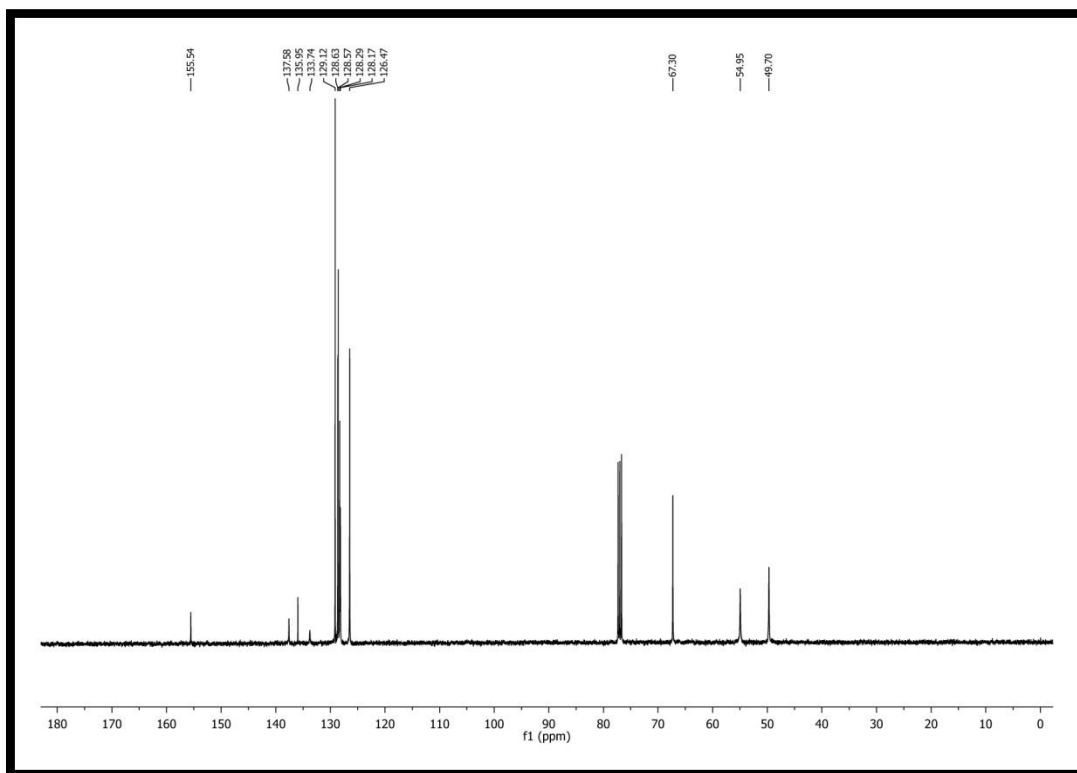

$^{13}\text{C}$  NMR Spectrum of Cbz-phg- $\psi$ [CH<sub>2</sub>NCS], 2a

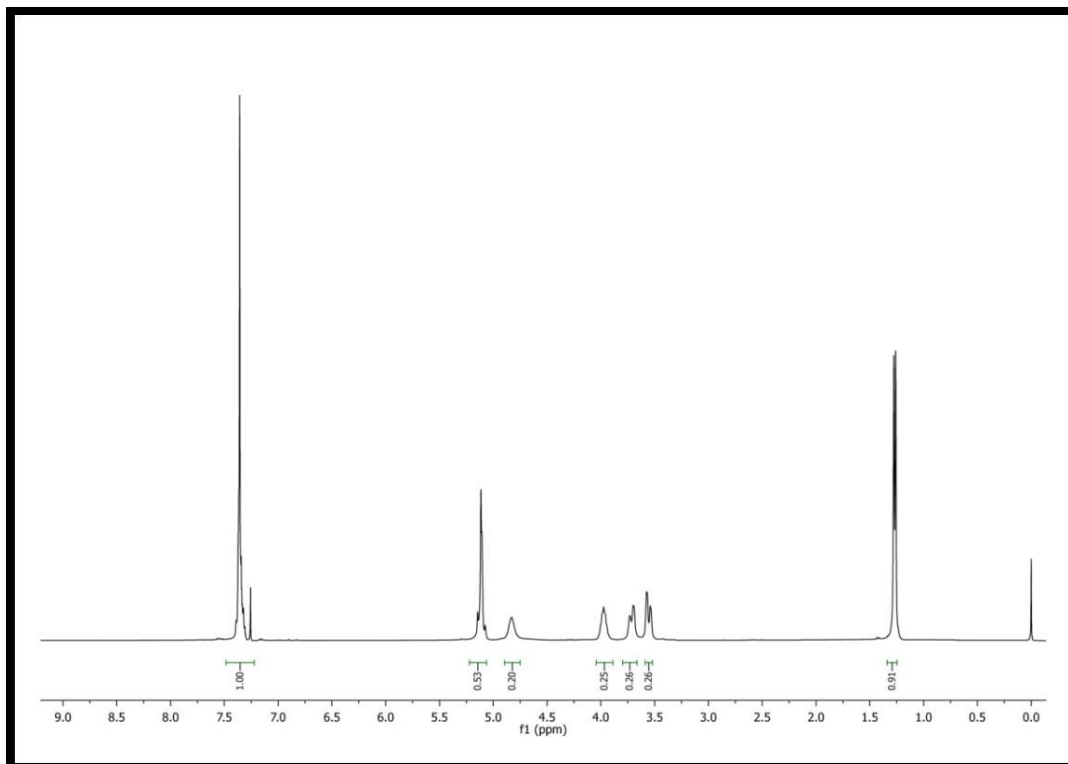

$^1\text{H}$  NMR Spectrum of Cbz-Ala- $\psi$ [CH<sub>2</sub>NCS], 2b

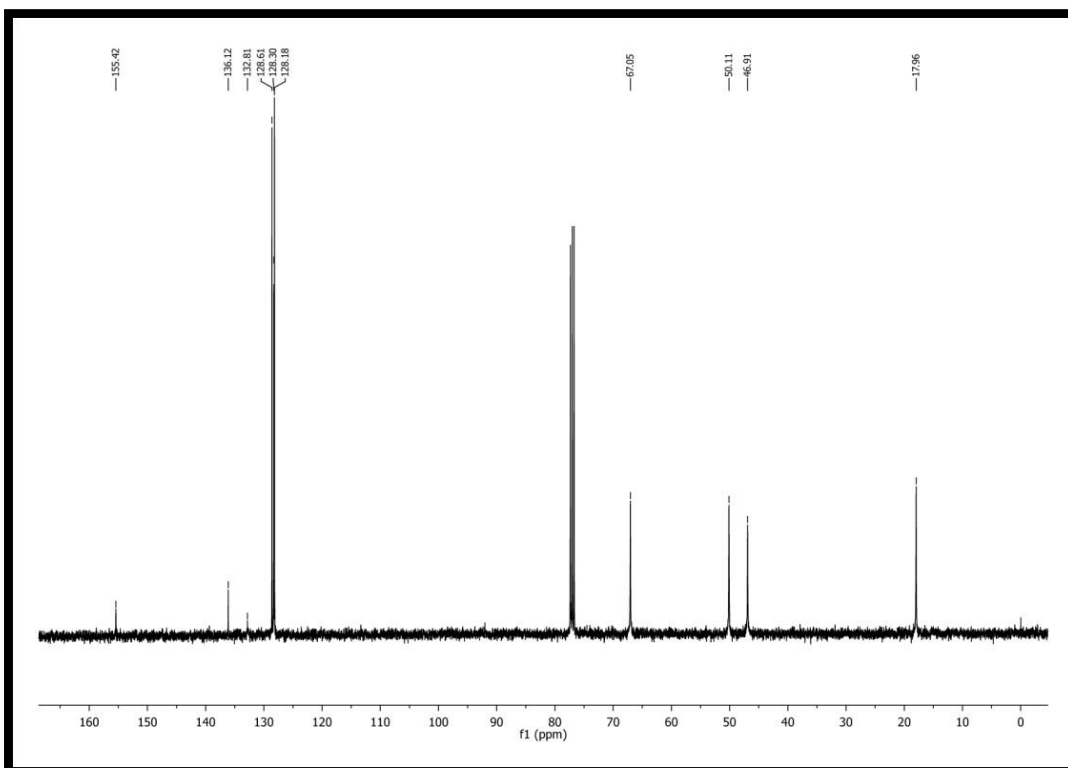

$^{13}\text{C}$  NMR Spectrum of Cbz-Ala- $\psi$ [CH<sub>2</sub>NCS], 2b

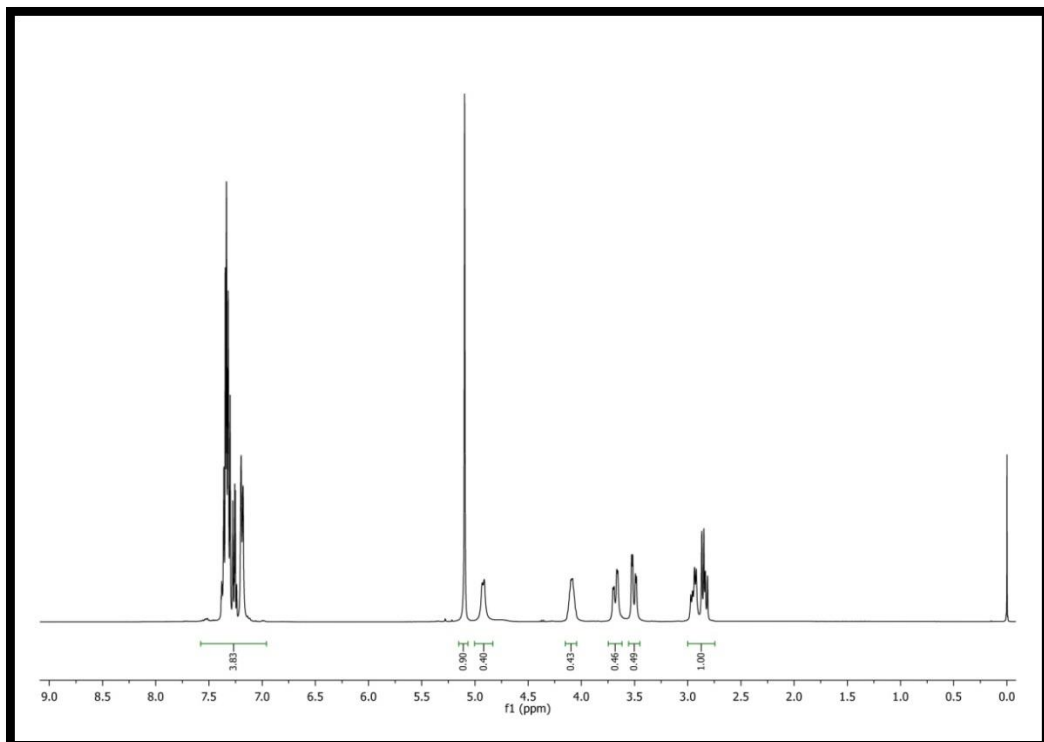

<sup>1</sup>H NMR Spectrum of Cbz-Phe-ψ[CH<sub>2</sub>NCS], 2c

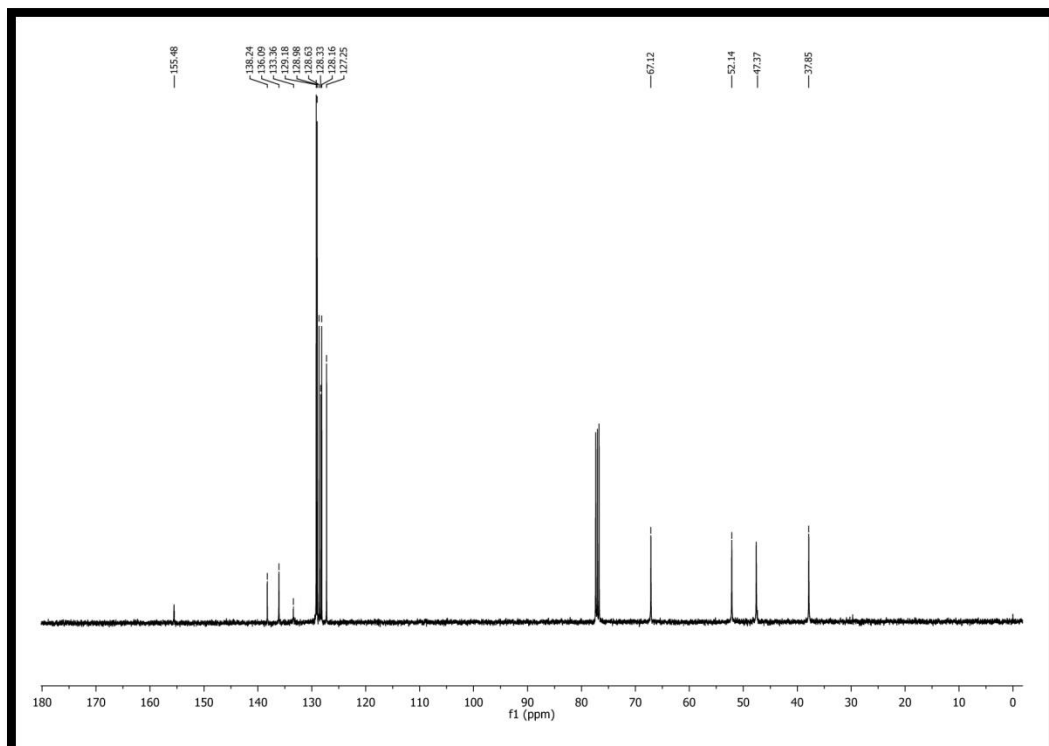

<sup>13</sup>C NMR Spectrum of Cbz-Phe-ψ[CH<sub>2</sub>NCS], 2c

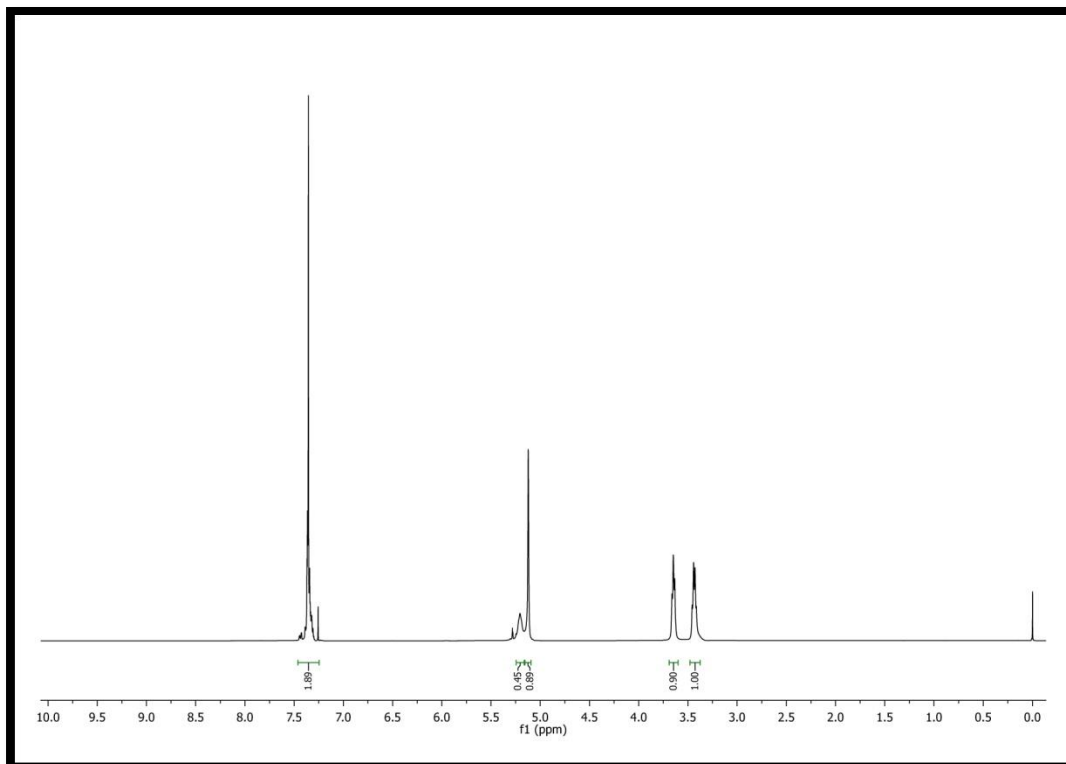

<sup>1</sup>H NMR Spectrum of Cbz-Gly-ψ[CH<sub>2</sub>NCS], 2d

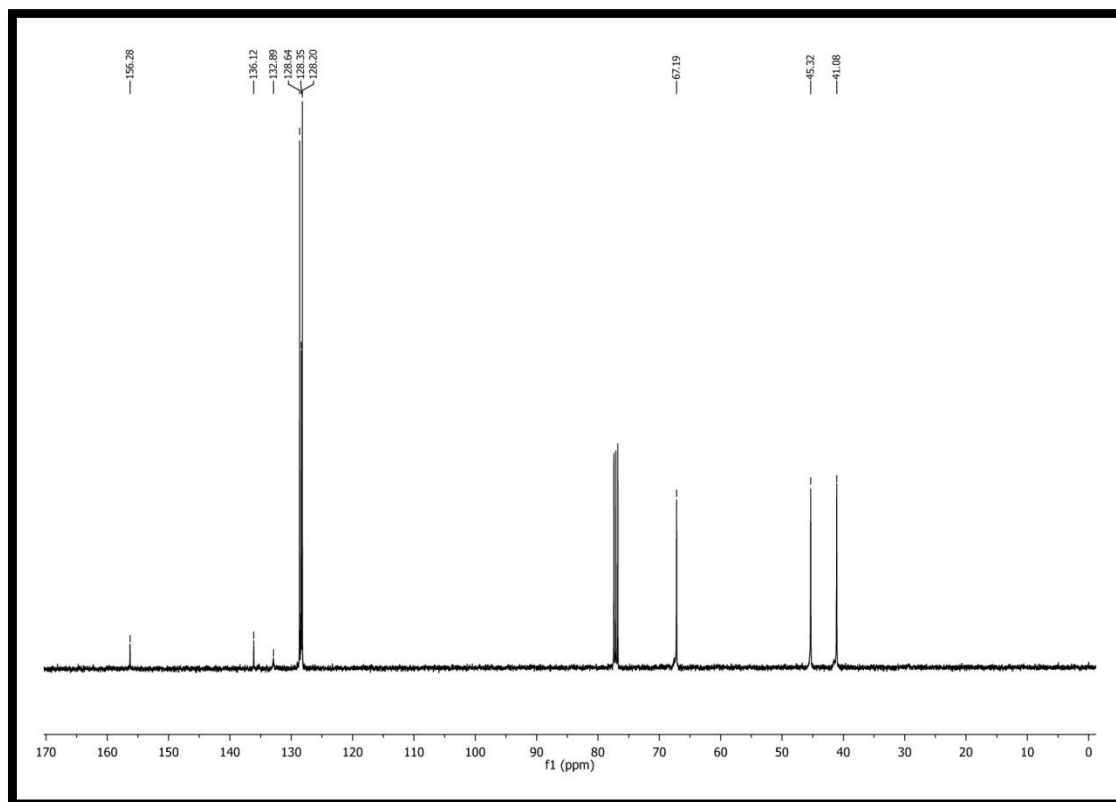

<sup>13</sup>C NMR Spectrum of Cbz-Gly-ψ[CH<sub>2</sub>NCS], 2d

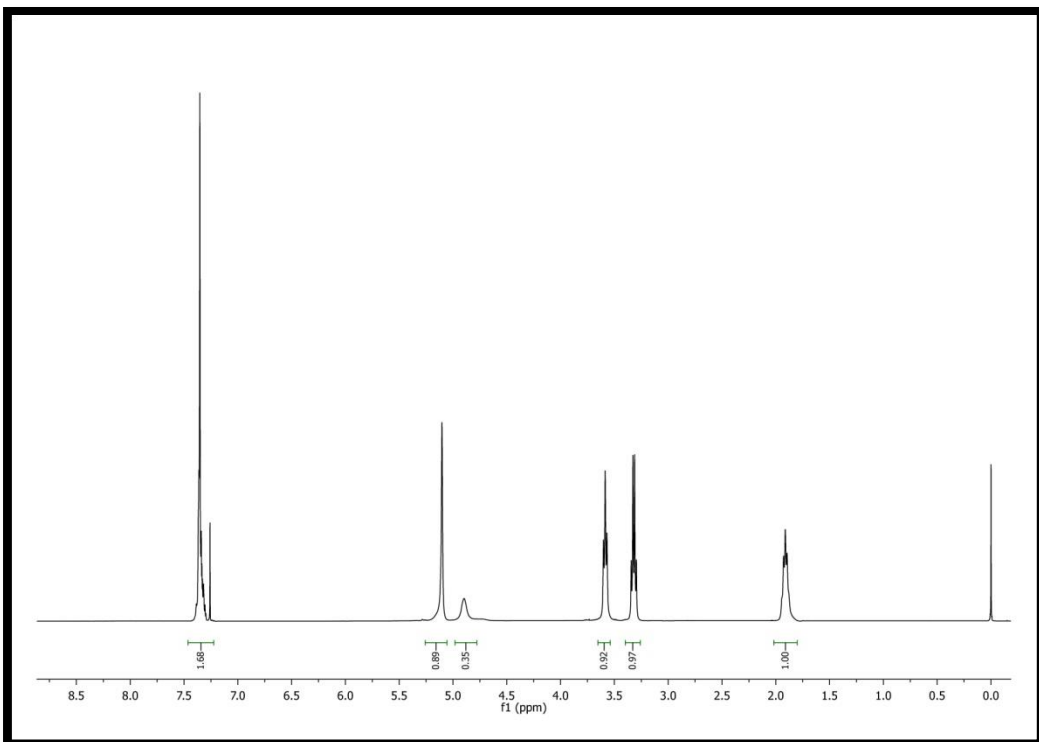

$^1\text{H}$  NMR Spectrum of Cbz- $\beta$ -ala- $\psi$ [CH<sub>2</sub>NCS], 2e

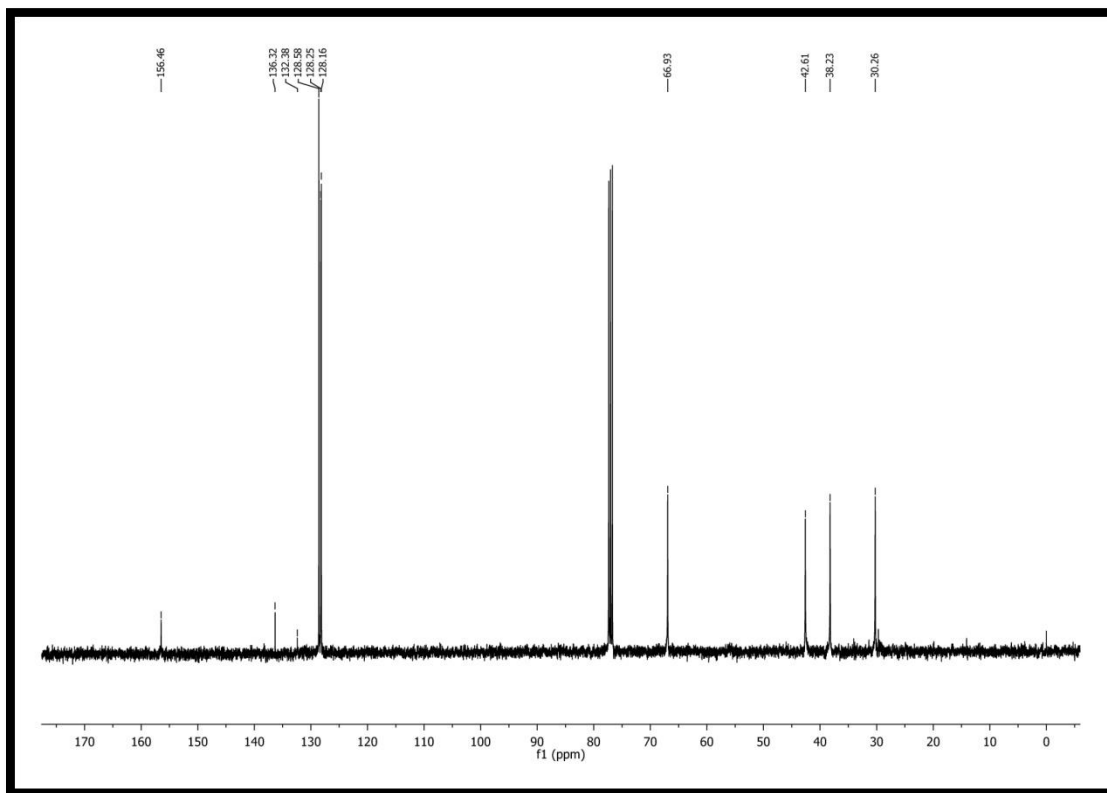

$^{13}\text{C}$  NMR Spectrum of Cbz- $\beta$ -ala- $\psi$ [CH<sub>2</sub>NCS], 2e

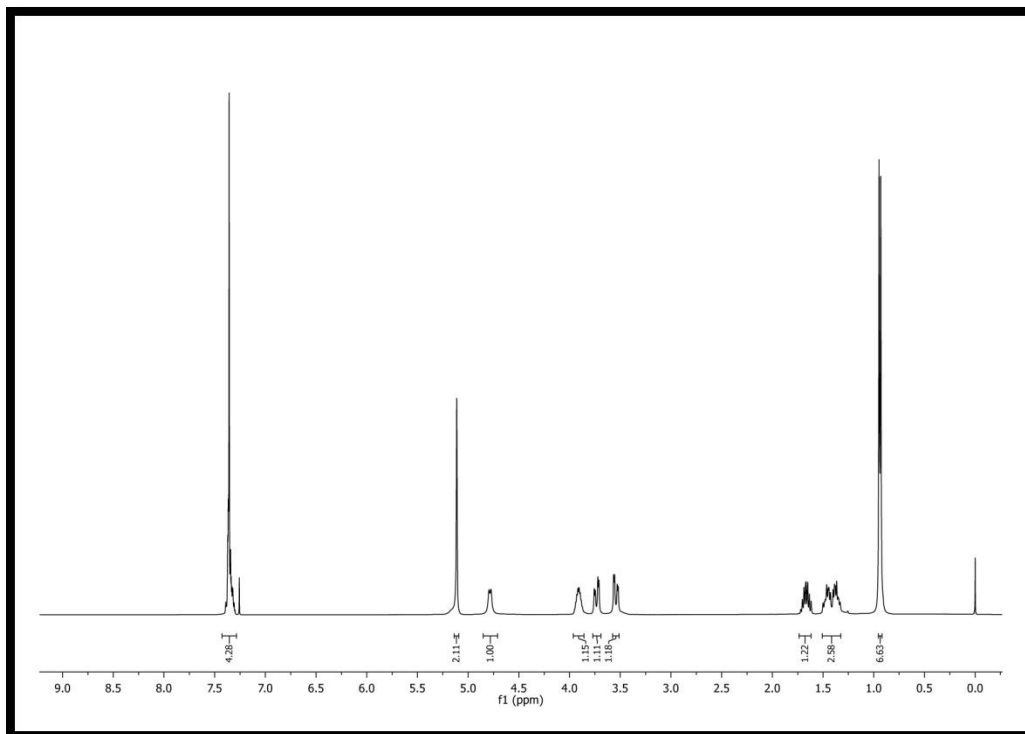

<sup>1</sup>H NMR Spectrum of Cbz-Leu-ψ[CH<sub>2</sub>NCS], 2f

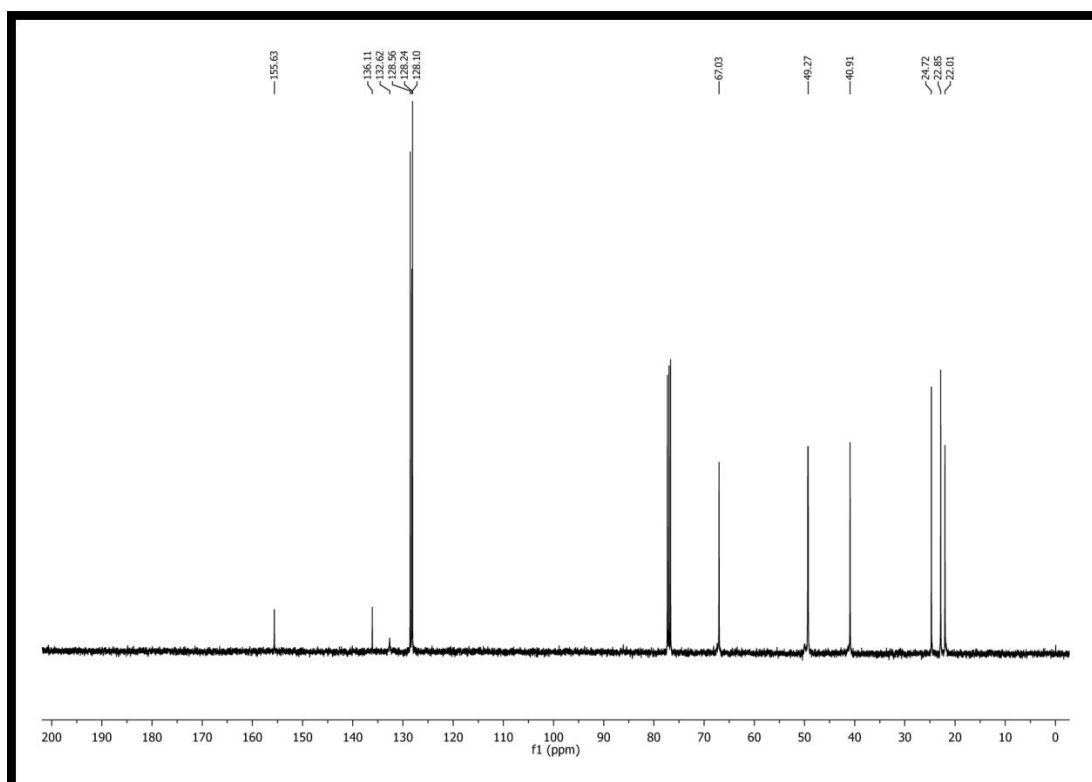

<sup>13</sup>C NMR Spectrum of Cbz-Leu-ψ[CH<sub>2</sub>NCS], 2f



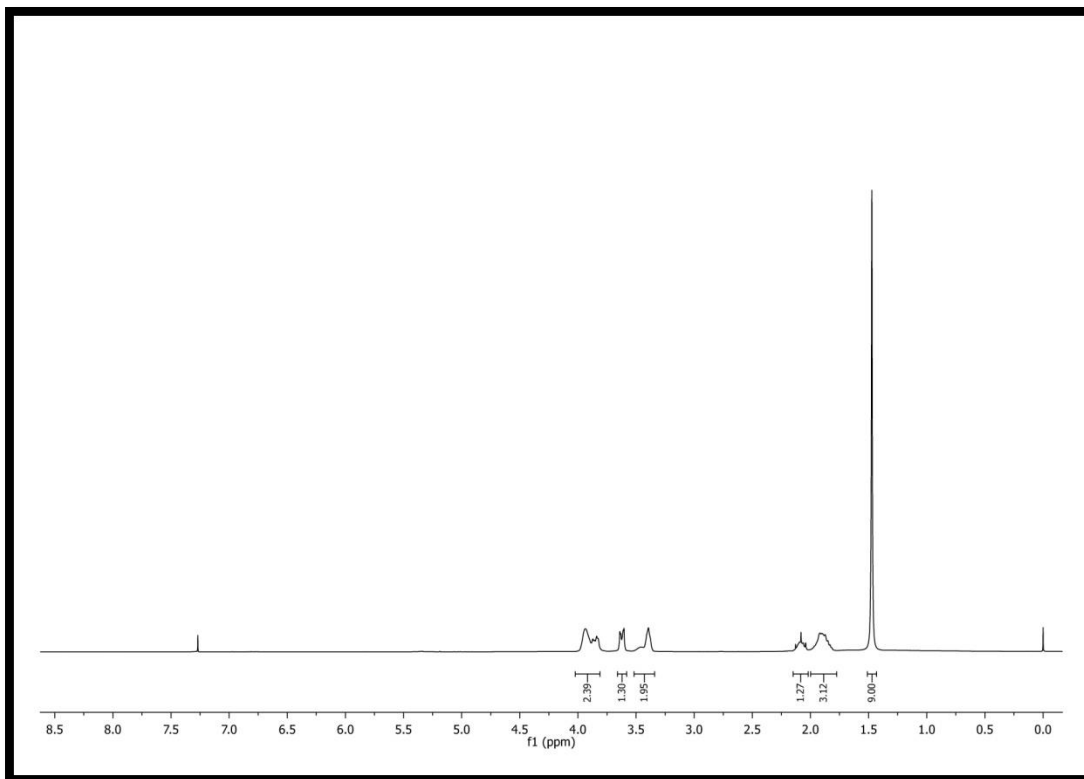

<sup>1</sup>H NMR Spectrum of Boc-Pro-ψ[CH<sub>2</sub>NCS], 2g

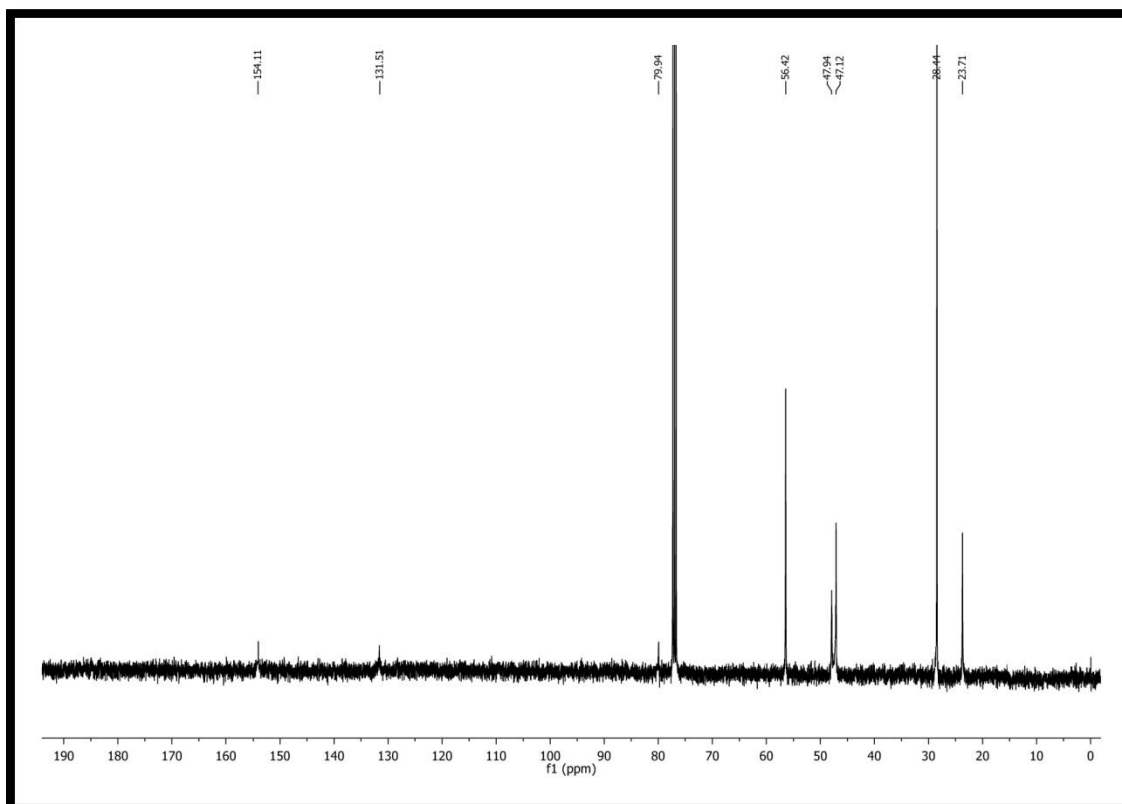

<sup>13</sup>C NMR Spectrum of Boc-Pro-ψ[CH<sub>2</sub>NCS], 2g

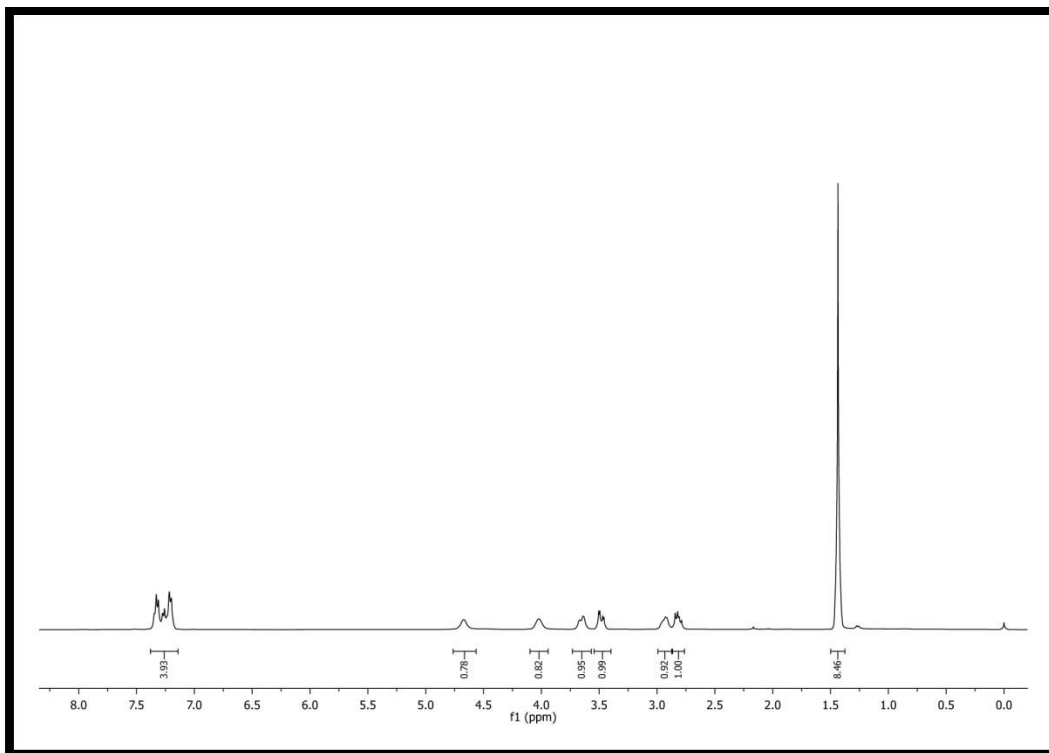

<sup>1</sup>H NMR Spectrum of Boc-Phe-ψ[CH<sub>2</sub>NCS], 2h

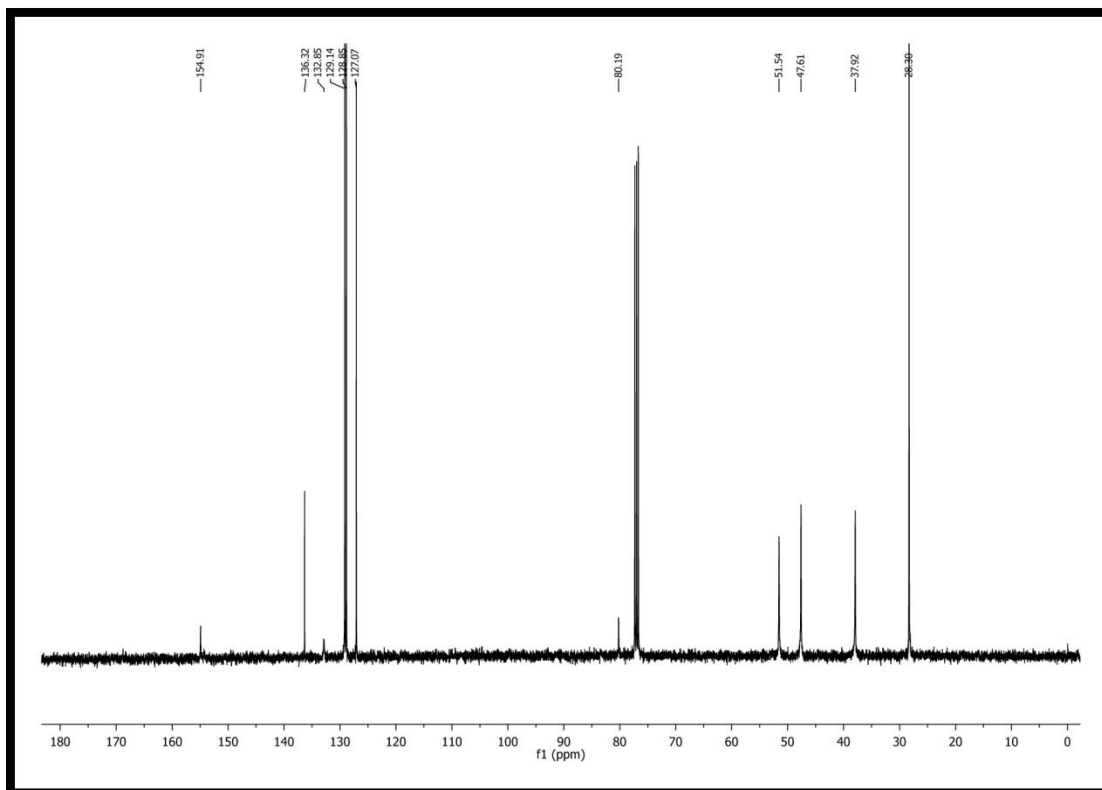

<sup>13</sup>C NMR Spectrum of Boc-Phe-ψ[CH<sub>2</sub>NCS], 2h

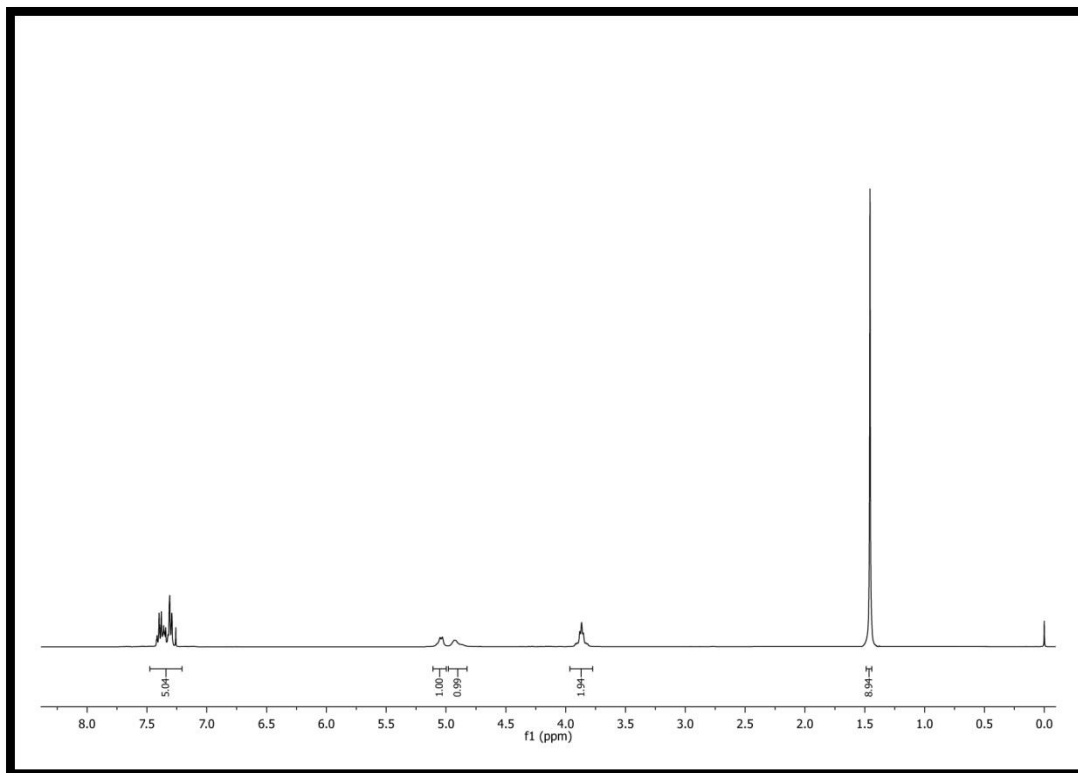

<sup>1</sup>H NMR Spectrum of Boc-Phg-ψ[CH<sub>2</sub>NCS], 2i

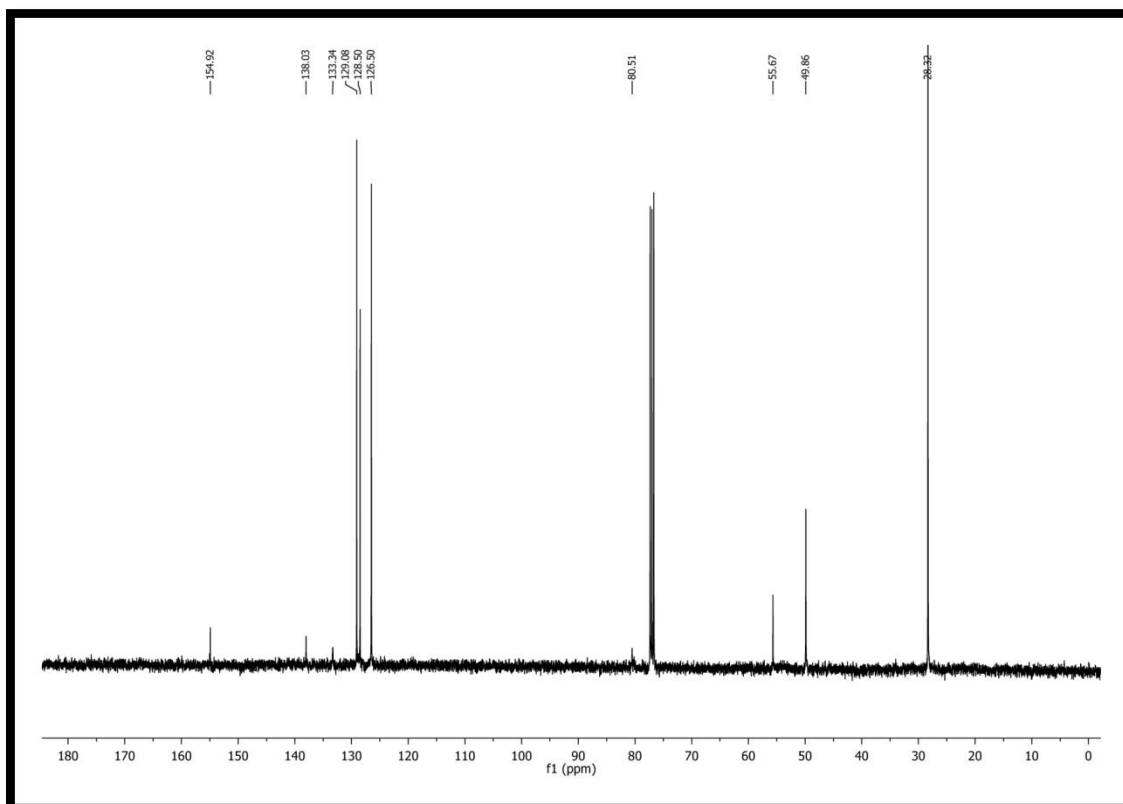

<sup>13</sup>C NMR Spectrum of Boc-Phg-ψ[CH<sub>2</sub>NCS], 2i

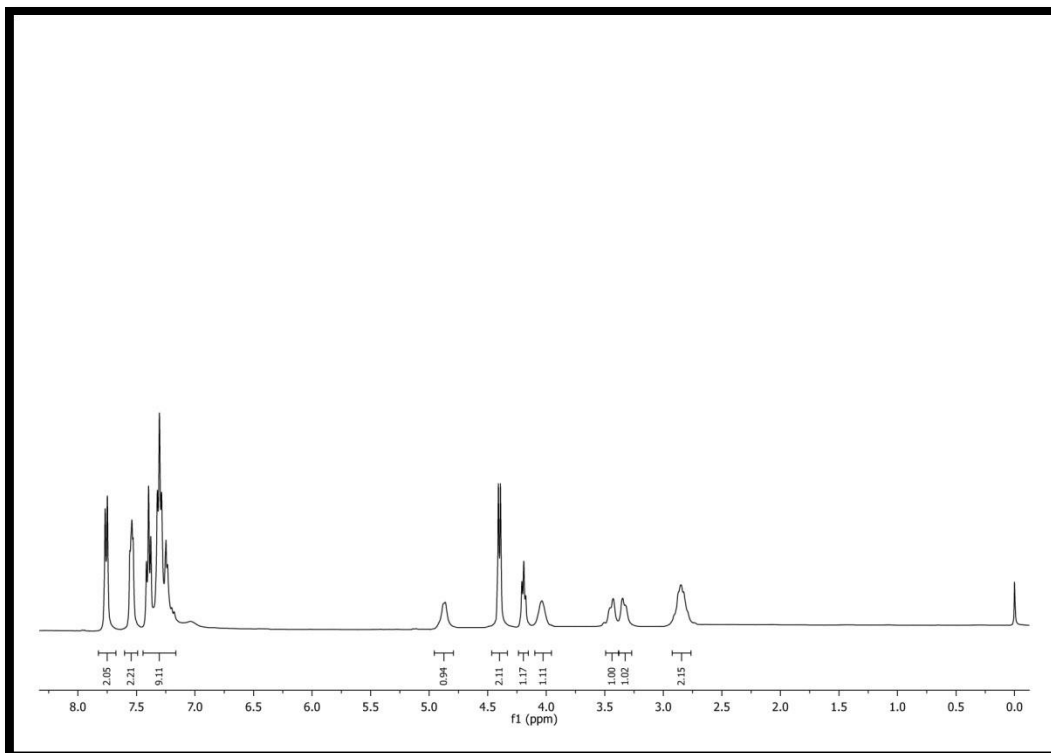

<sup>1</sup>H NMR Spectrum of Fmoc-Phe-ψ[CH<sub>2</sub>NCS], 2j

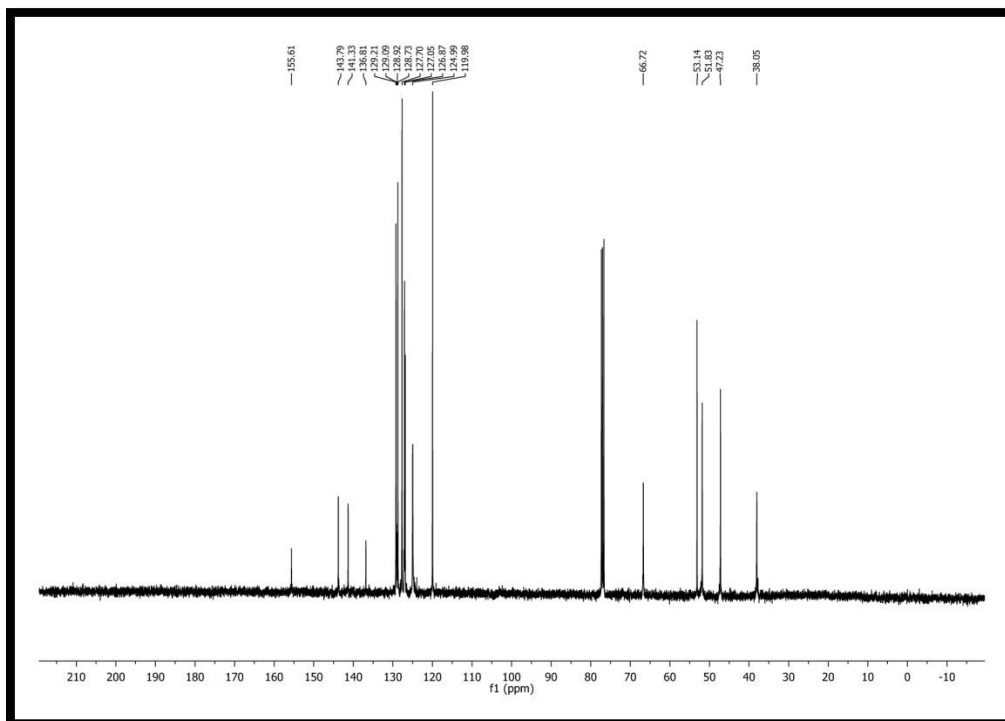

<sup>13</sup>C NMR Spectrum of Fmoc-Phe-ψ[CH<sub>2</sub>NCS], 2j

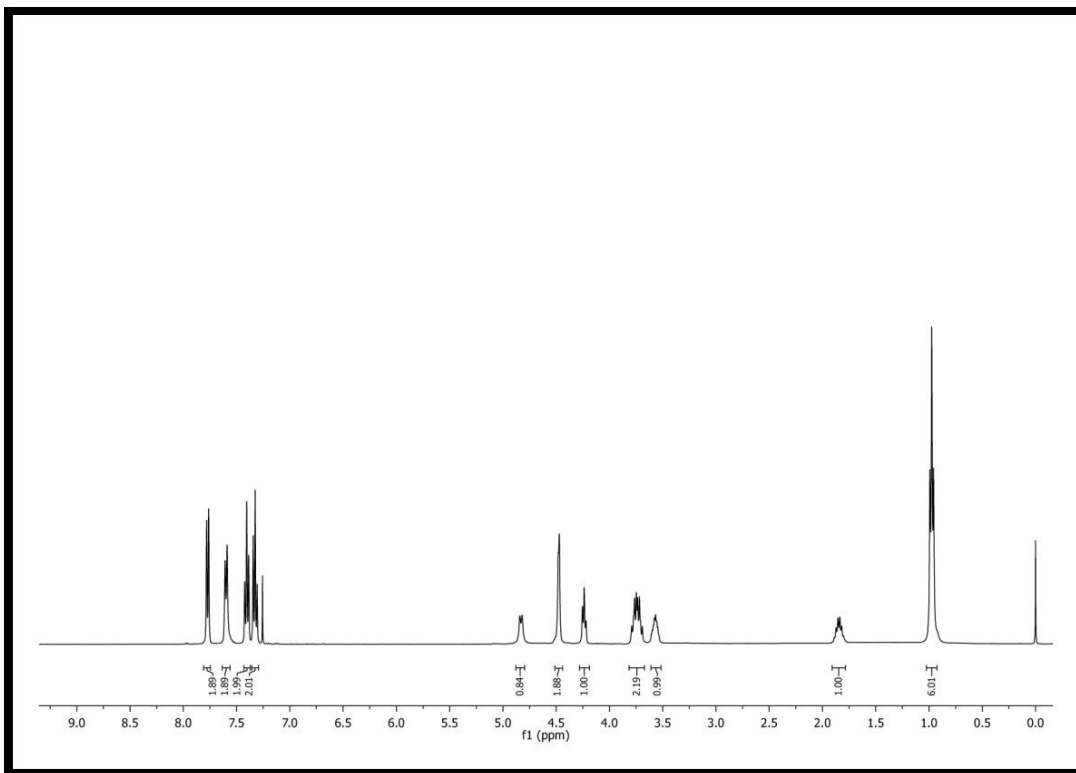

<sup>1</sup>H NMR Spectrum of Fmoc-Val-ψ[CH<sub>2</sub>NCS], 2k

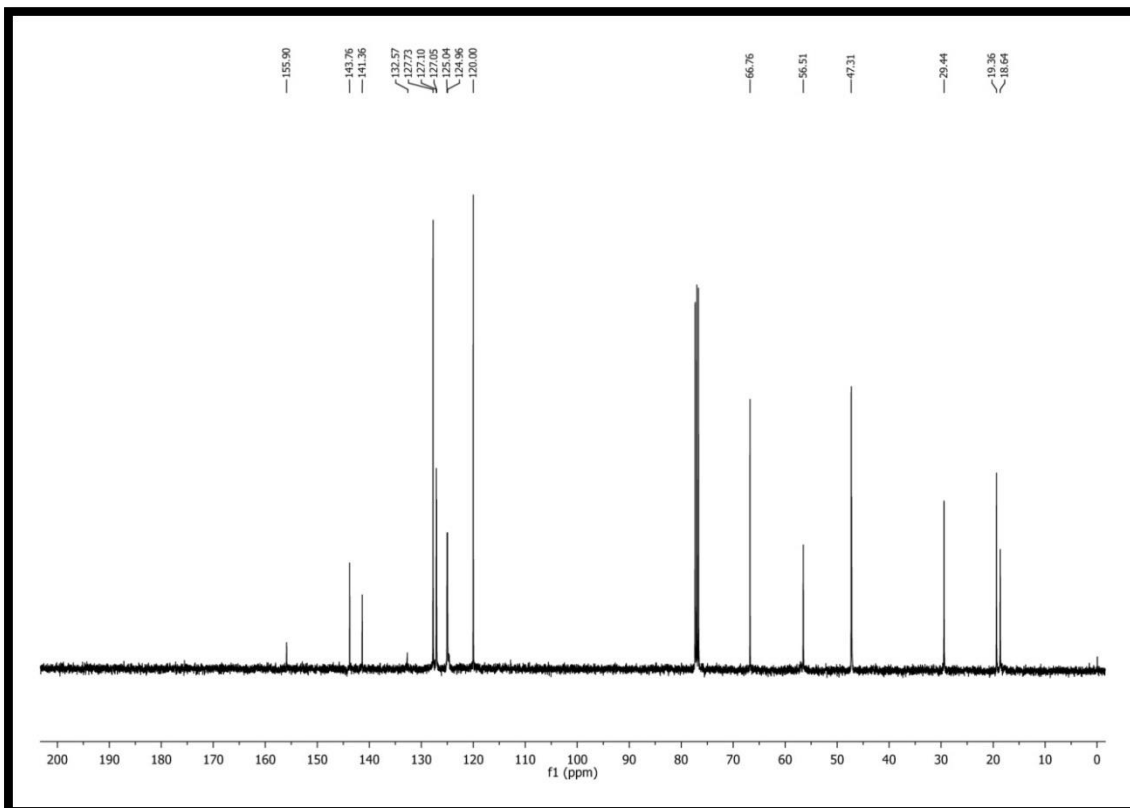

<sup>13</sup>C NMR Spectrum of Fmoc-Val-ψ[CH<sub>2</sub>NCS], 2k

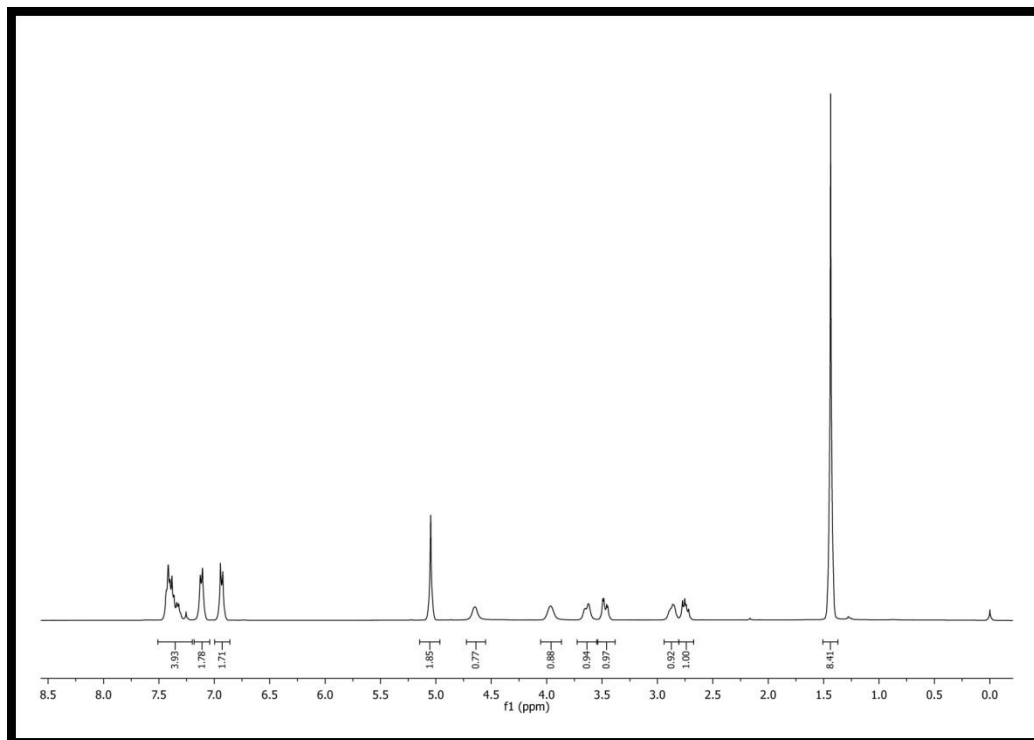

<sup>1</sup>H NMR Spectrum of Boc-Tyr(Bzl)-ψ[CH<sub>2</sub>NCS], 21

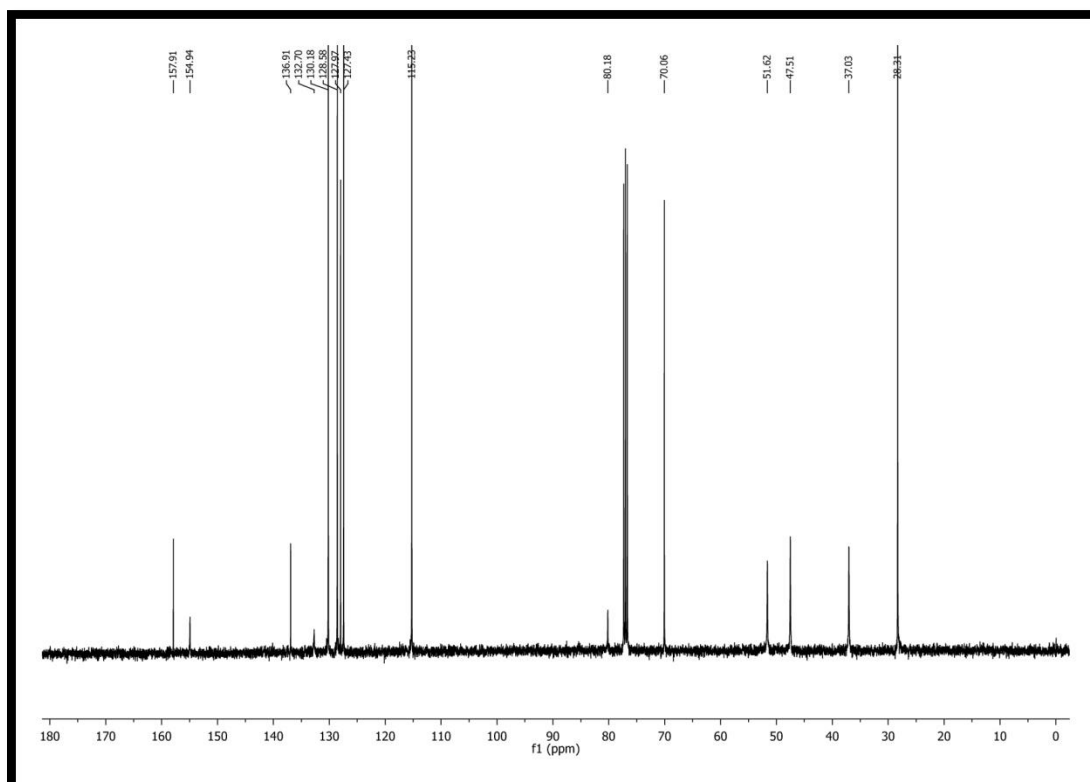

<sup>13</sup>C NMR Spectrum of Boc-Tyr(Bzl)-ψ[CH<sub>2</sub>NCS], 21

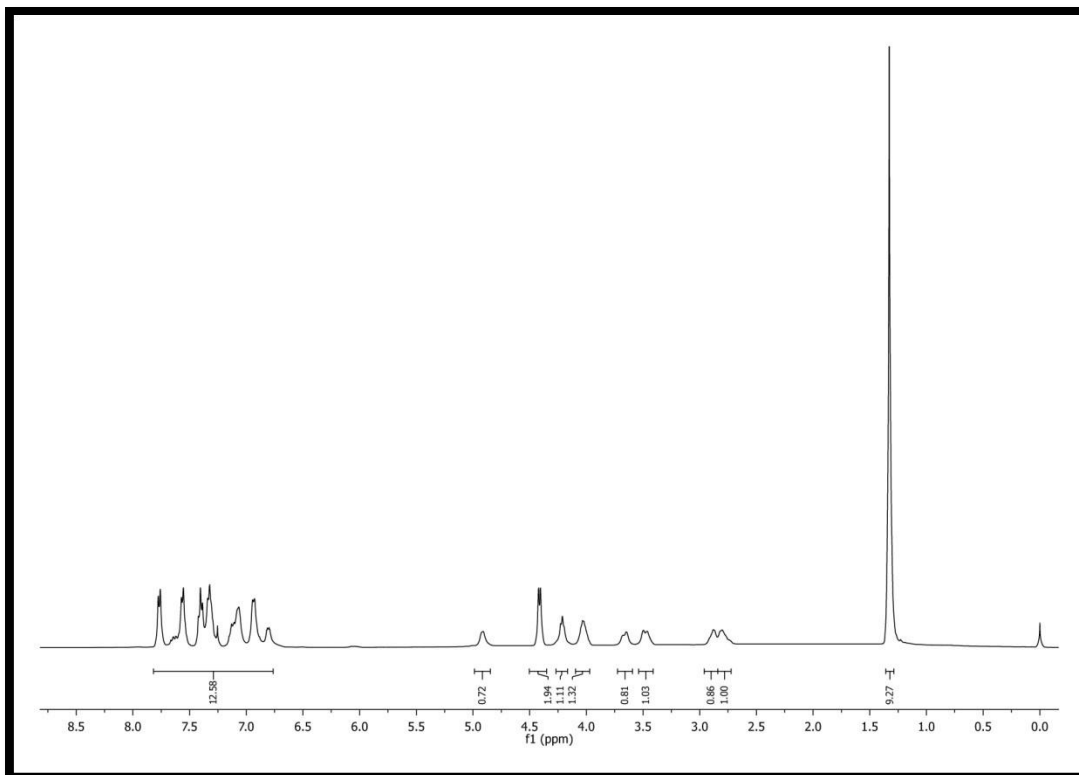

<sup>1</sup>H NMR Spectrum of Fmoc-Tyr(<sup>t</sup>Bu)-ψ[CH<sub>2</sub>NCS], 2m

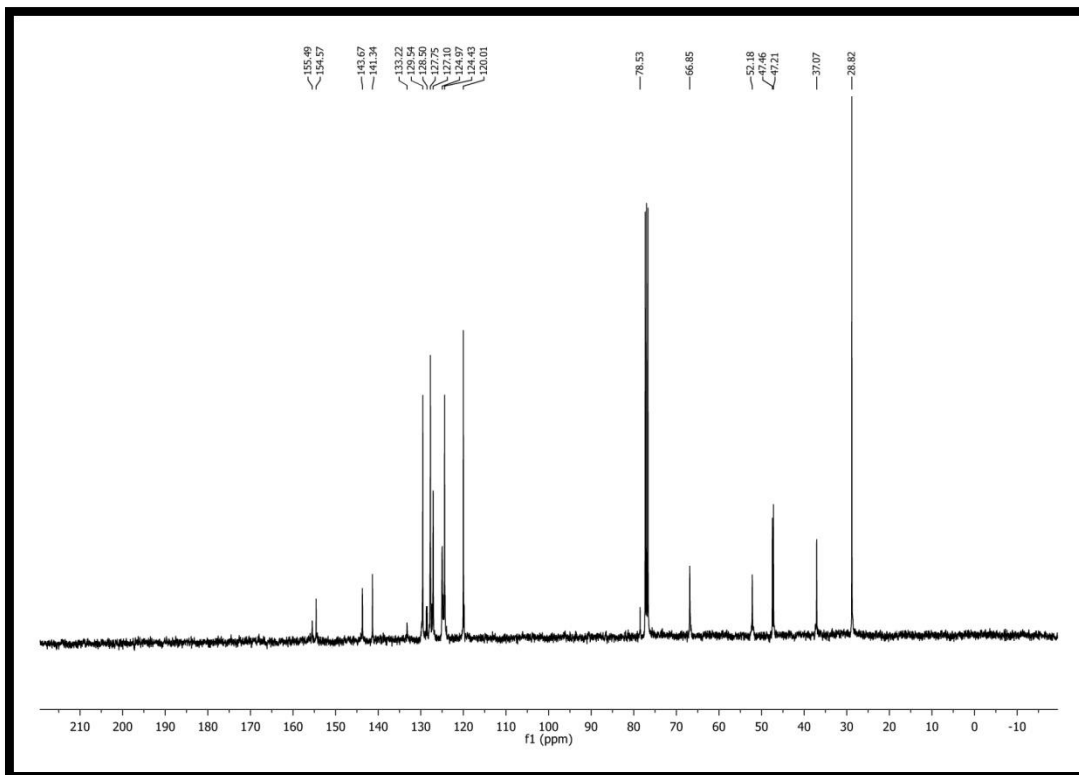

<sup>13</sup>C NMR Spectrum of Fmoc-Tyr(<sup>t</sup>Bu)-ψ[CH<sub>2</sub>NCS], 2m

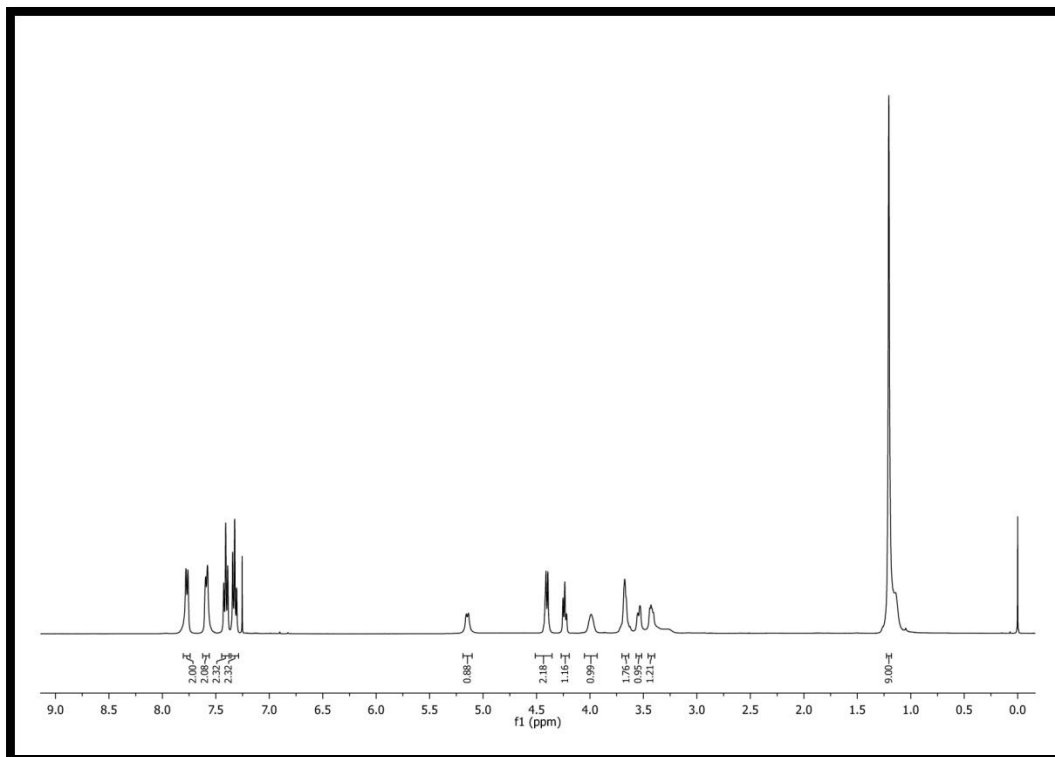

<sup>1</sup>H NMR Spectrum of Fmoc-Ser(<sup>t</sup>Bu)-ψ[CH<sub>2</sub>NCS], 2n

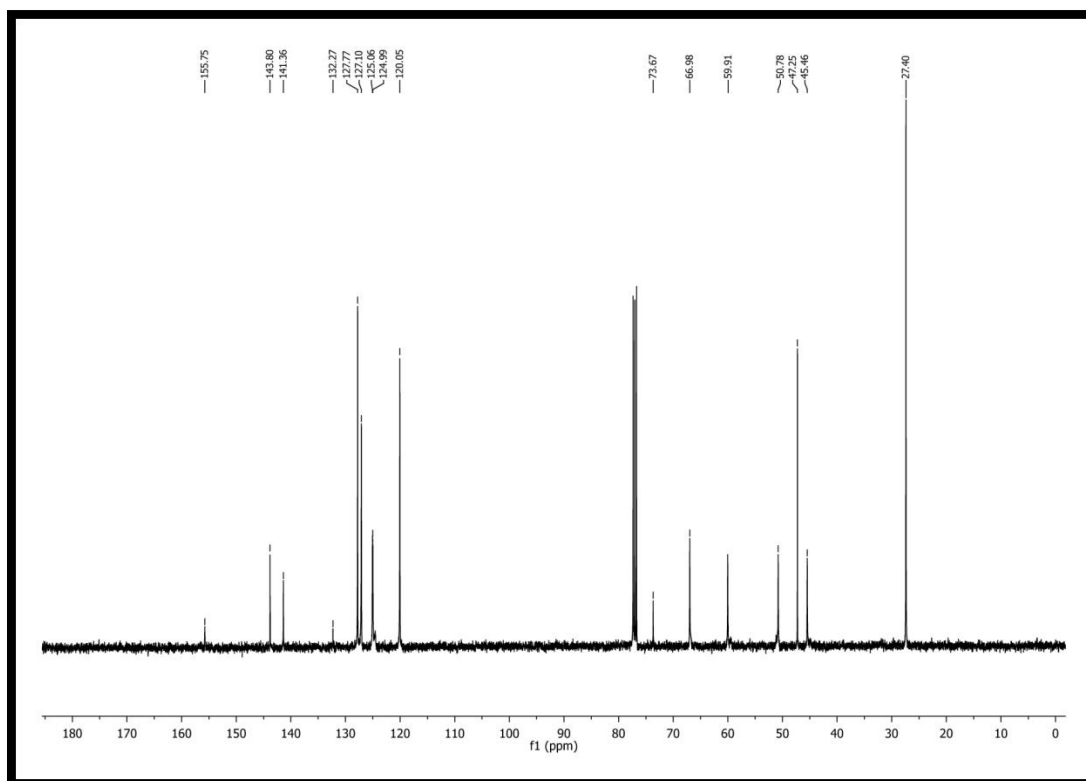

<sup>13</sup>C NMR Spectrum of Fmoc-Ser(<sup>t</sup>Bu)-ψ[CH<sub>2</sub>NCS], 2n



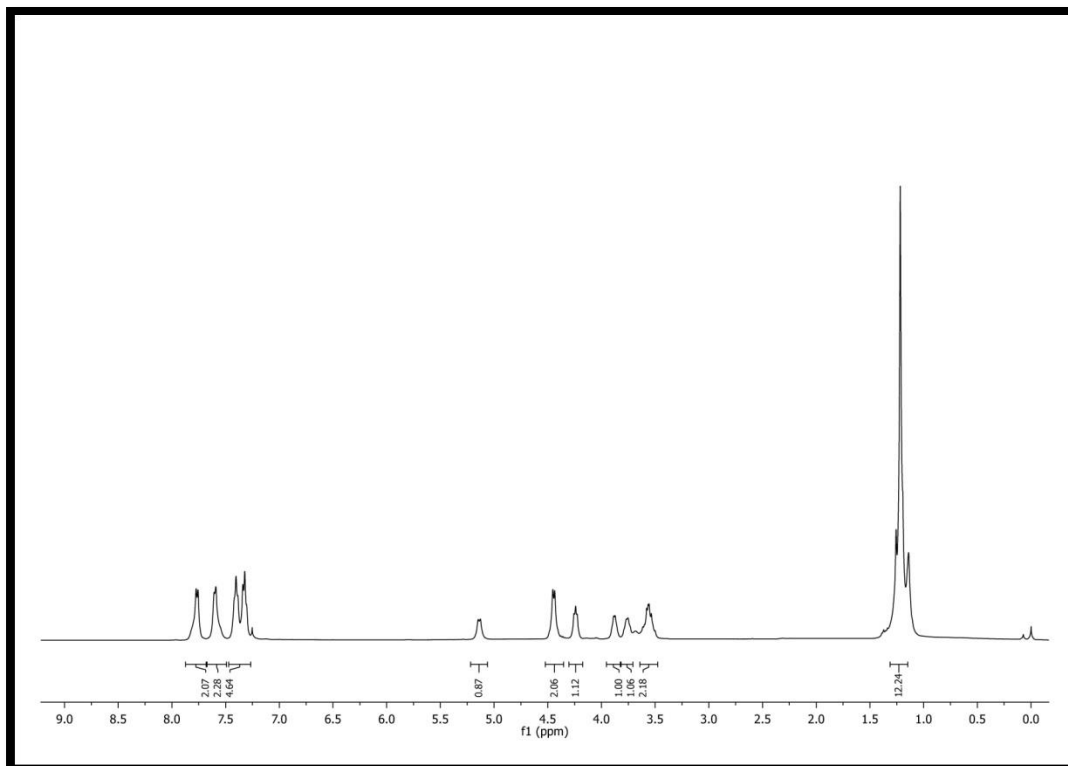

$^1\text{H}$  NMR Spectrum of Fmoc-Thr( $^t\text{Bu}$ )- $\psi[\text{CH}_2\text{NCS}]$ , 2o

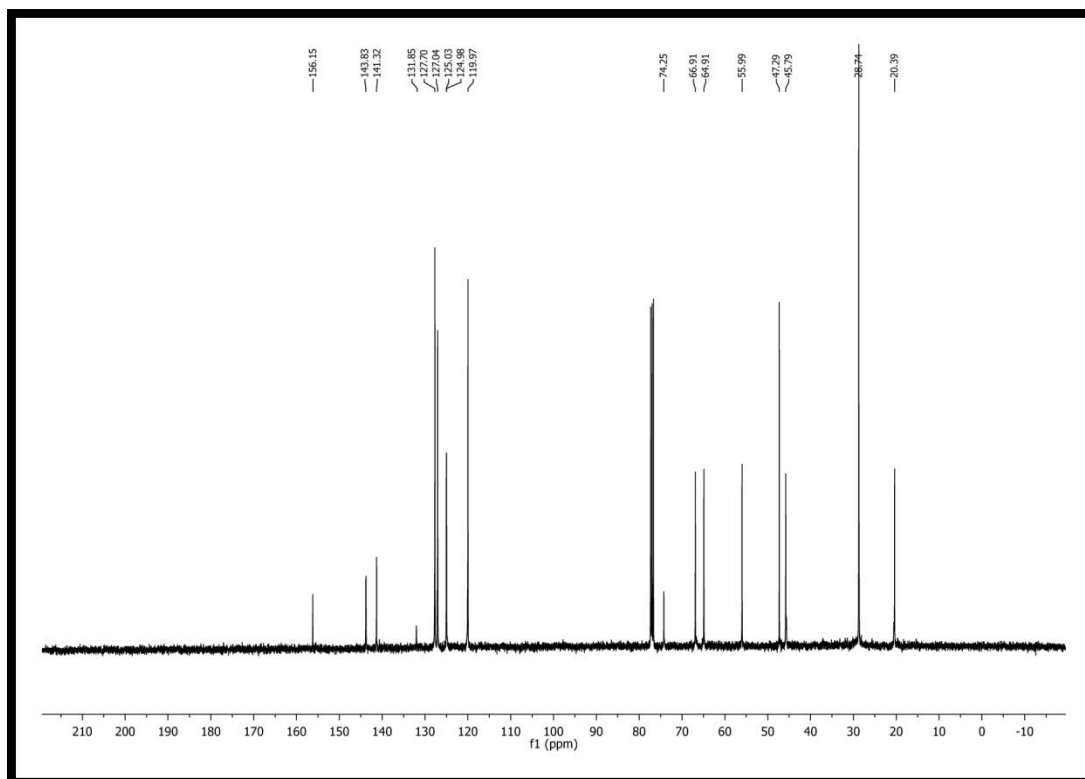

$^{13}\text{C}$  NMR Spectrum of Fmoc-Thr( $^t\text{Bu}$ )- $\psi[\text{CH}_2\text{NCS}]$ , 2o

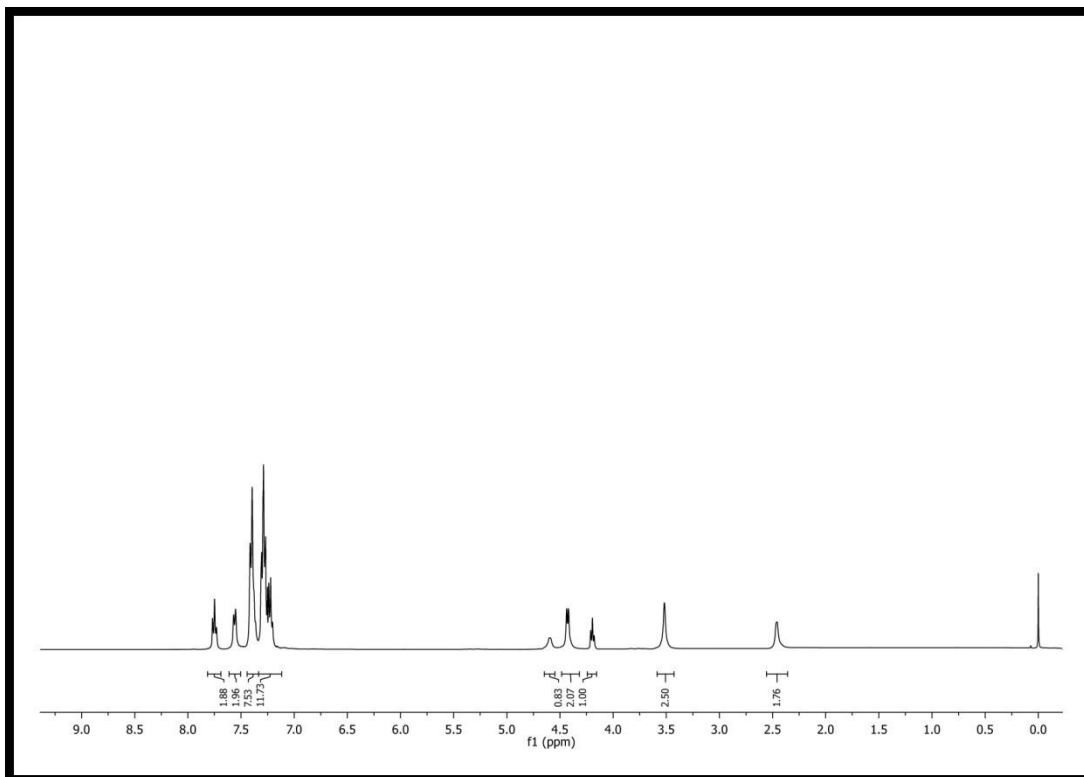

$^1\text{H}$  NMR Spectrum of Fmoc-Cys(Trt)- $\psi$ [CH<sub>2</sub>NCS], 2p

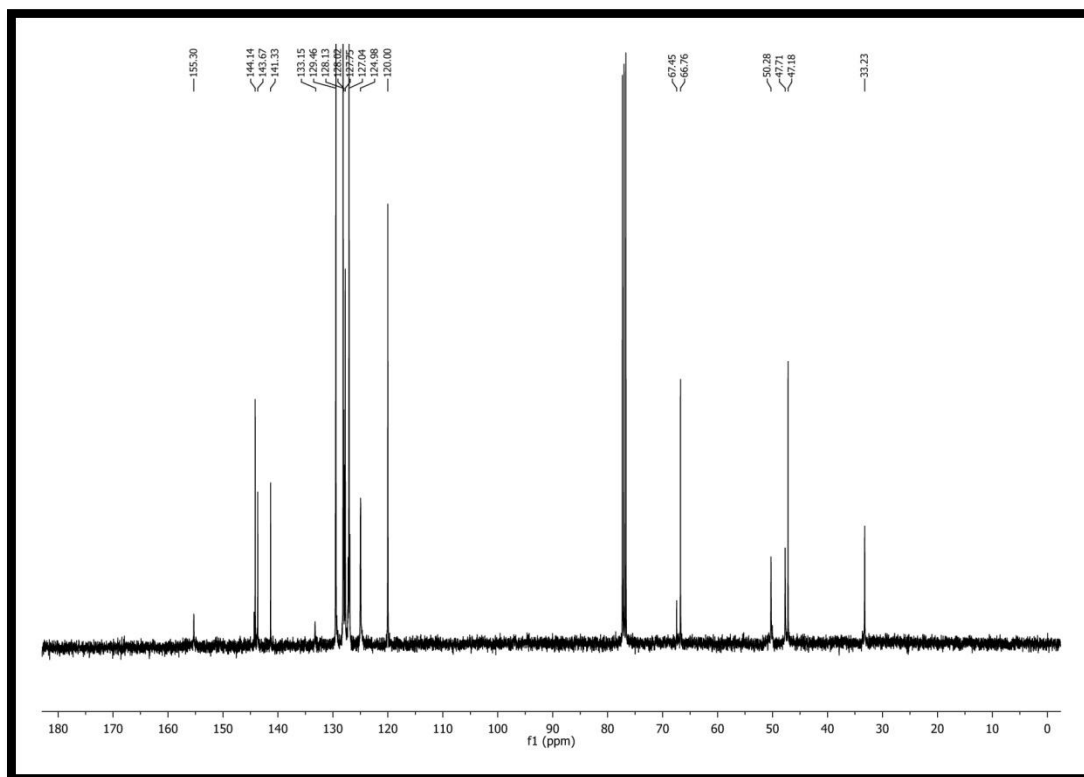

$^{13}\text{C}$  NMR Spectrum of Fmoc-Cys(Trt)- $\psi$ [CH<sub>2</sub>NCS], 2p

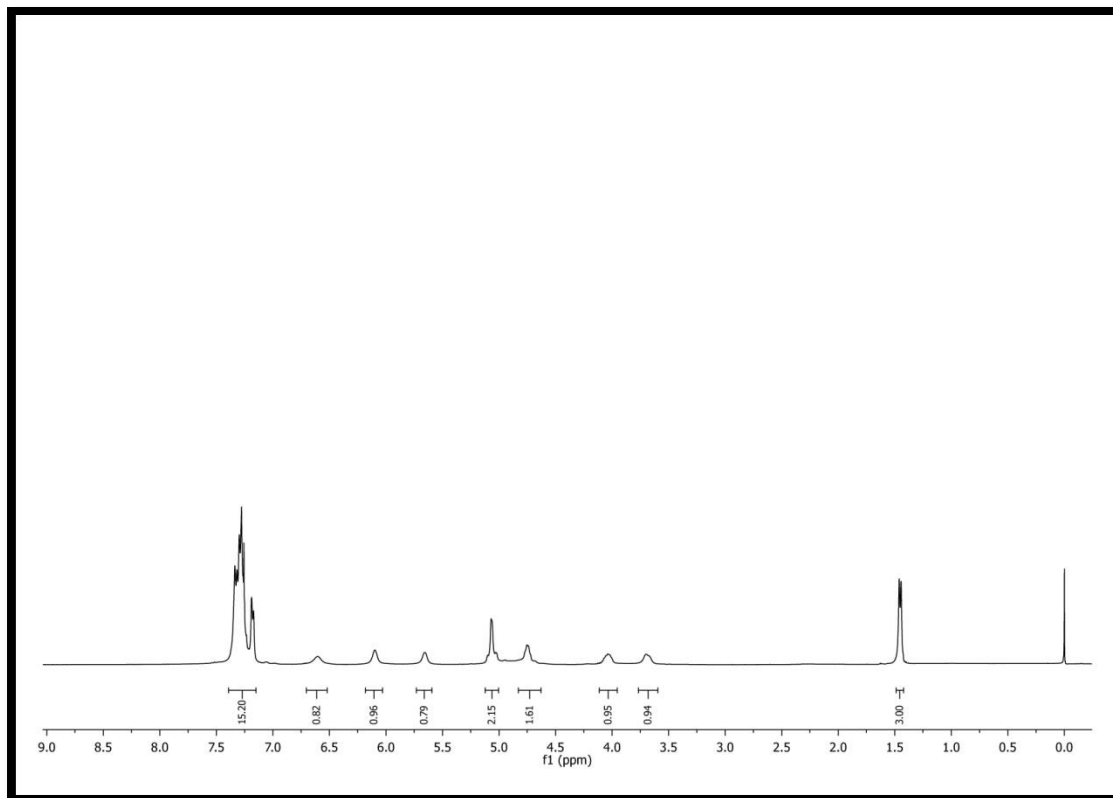

<sup>1</sup>H NMR Spectrum of Cbz-phg-ψ[CH<sub>2</sub>NHCSNH]-(*R*)-(+)-1-phenylethylamine, 3a

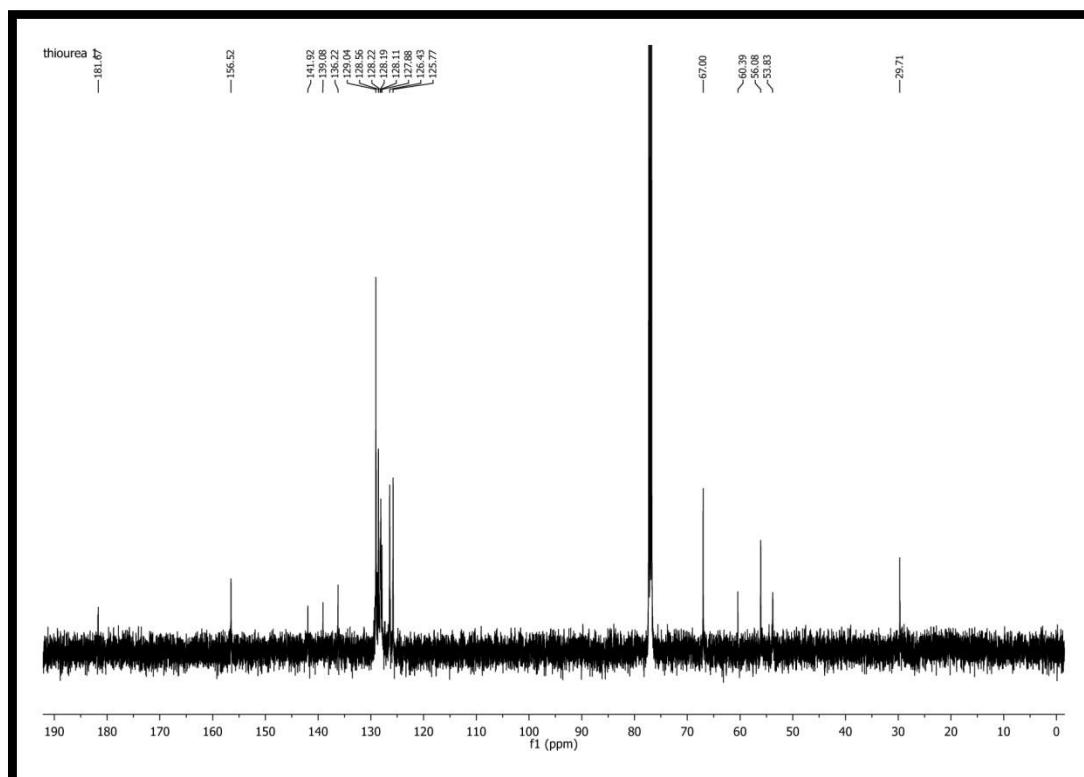

<sup>13</sup>C NMR Spectrum of Cbz-phg-ψ[CH<sub>2</sub>NHCSNH]-(*R*)-(+)-1-phenylethylamine, 3a

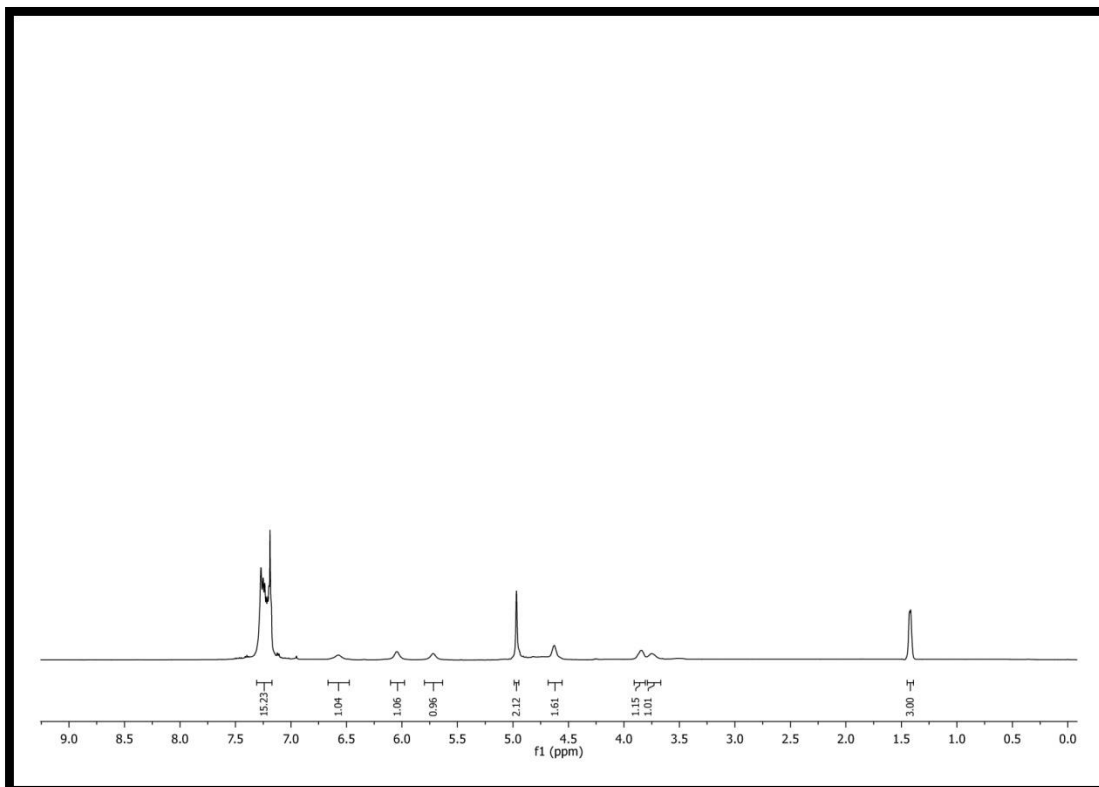

<sup>1</sup>H NMR Spectrum of Cbz-phg-ψ[CH<sub>2</sub>NHCSNH]-(S)-(-)-1-phenylethylamine, 3a\*

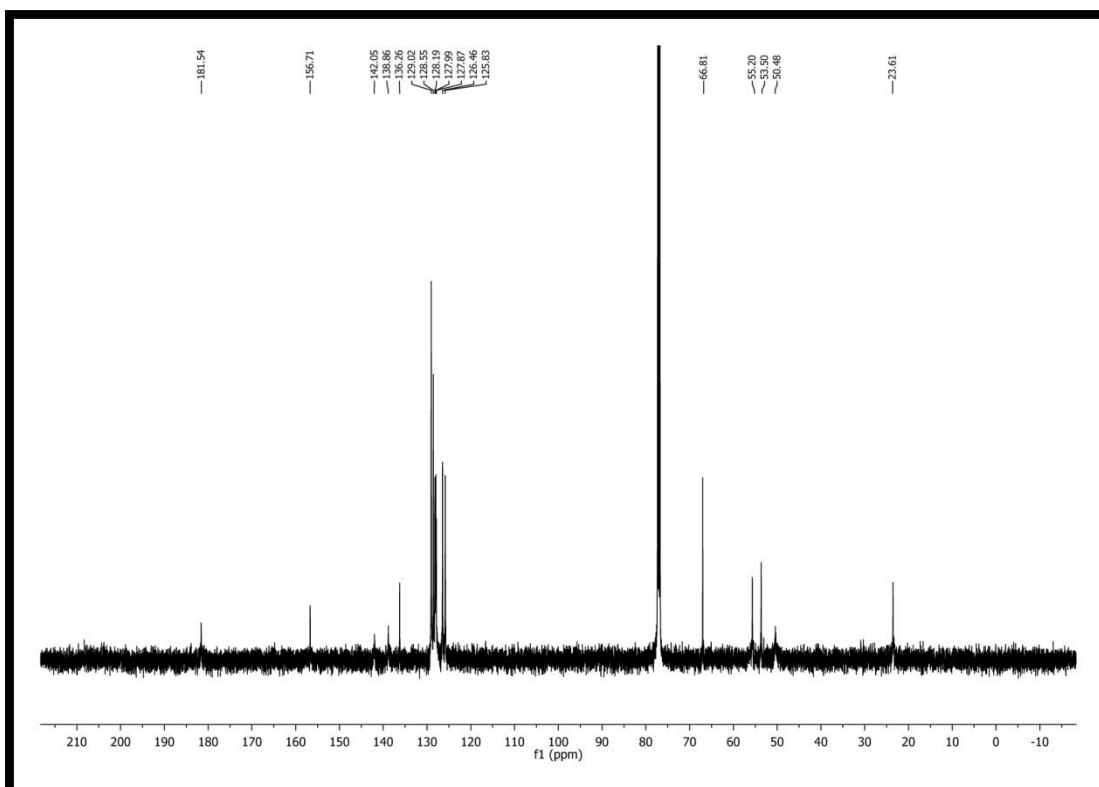

<sup>13</sup>C NMR Spectrum of Cbz-phg-ψ[CH<sub>2</sub>NHCSNH]-(S)-(-)-1-phenylethylamine, 3a\*

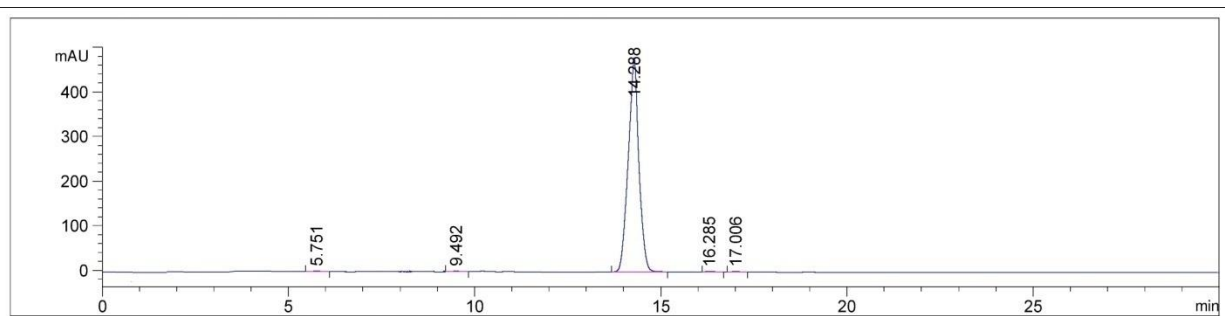

RP-HPLC Chromatogram 3a

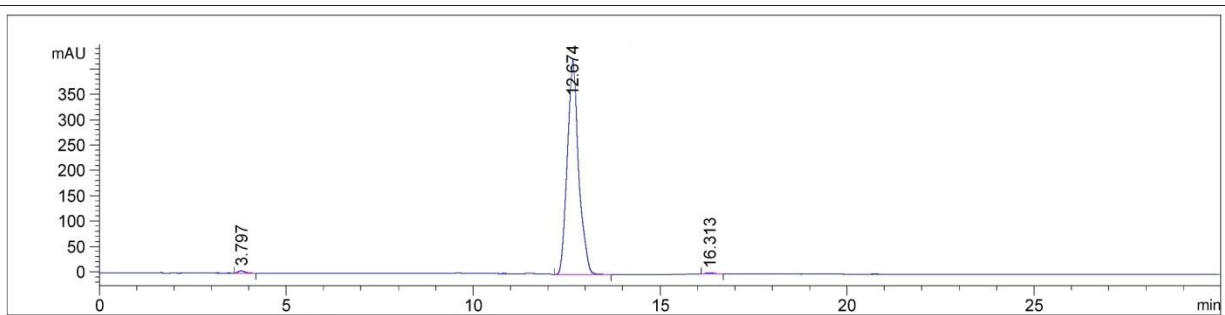

RP-HPLC Chromatogram 3a\*

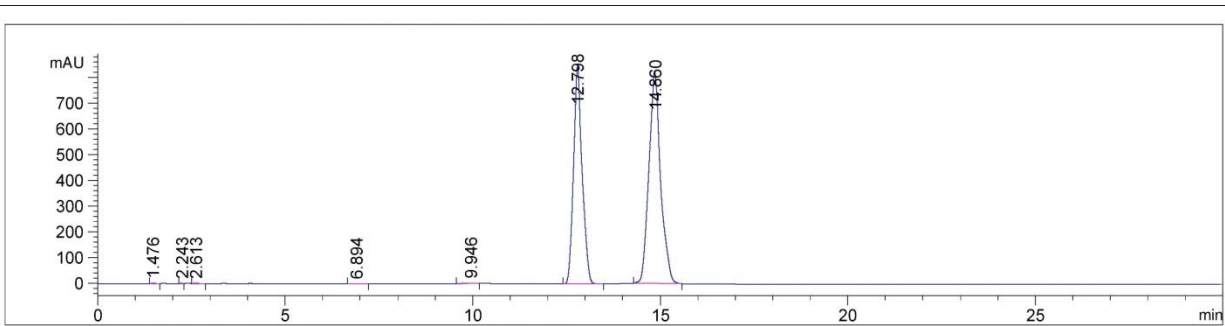

RP-HPLC Chromatogram of equimolar mixture of 3a and 3a\*

RP-HPLC profiles of (3a) and (3a\*) (method: gradient 0.1% TFA water-acetonitrile (0-100%) in 30 min; VWD at  $\lambda = 254$  nm; flow rate: 1.0 mL/min; column: Agilent Eclipse, XDB-C18, pore size-5  $\mu\text{m}$ , diameter x length = 4.6 x 150 nm).

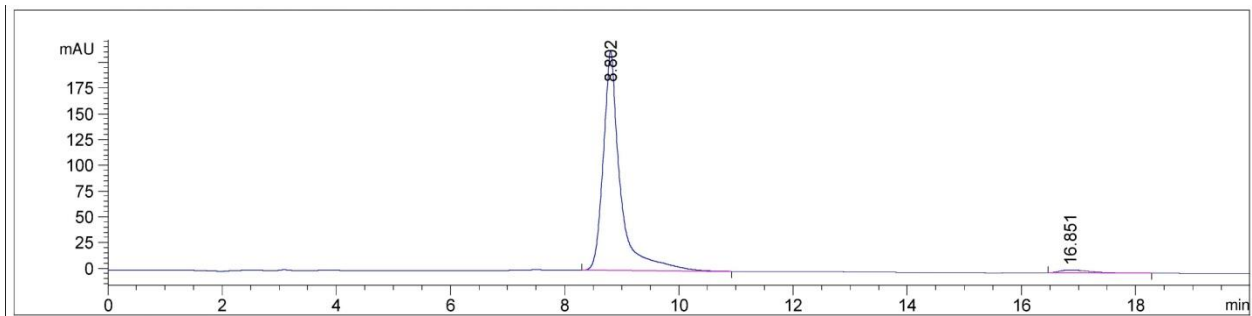

RP-HPLC Chromatogram of 2a

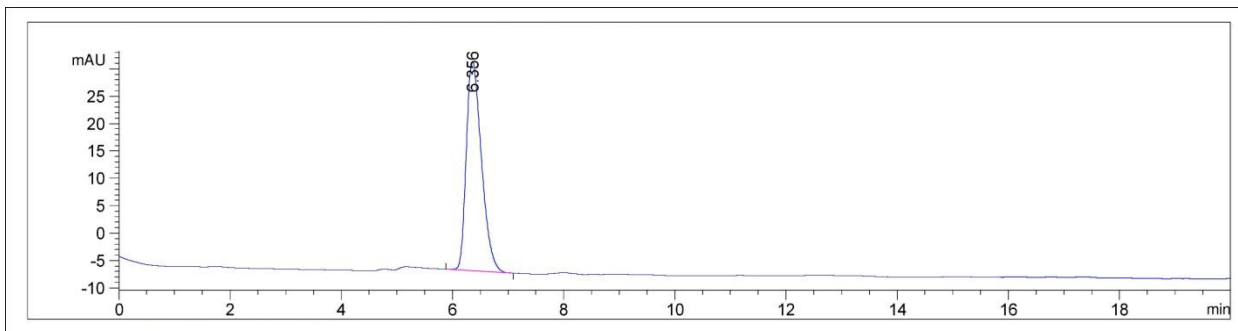

RP-HPLC Chromatogram of 2b

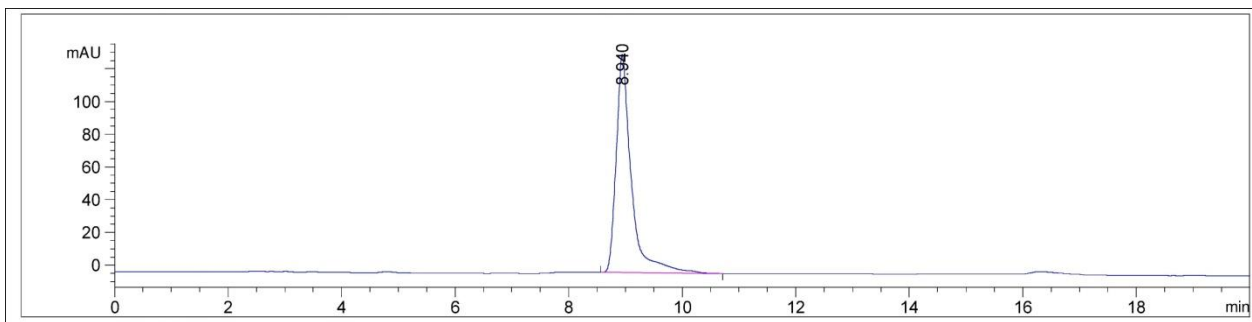

RP-HPLC Chromatogram of 2c

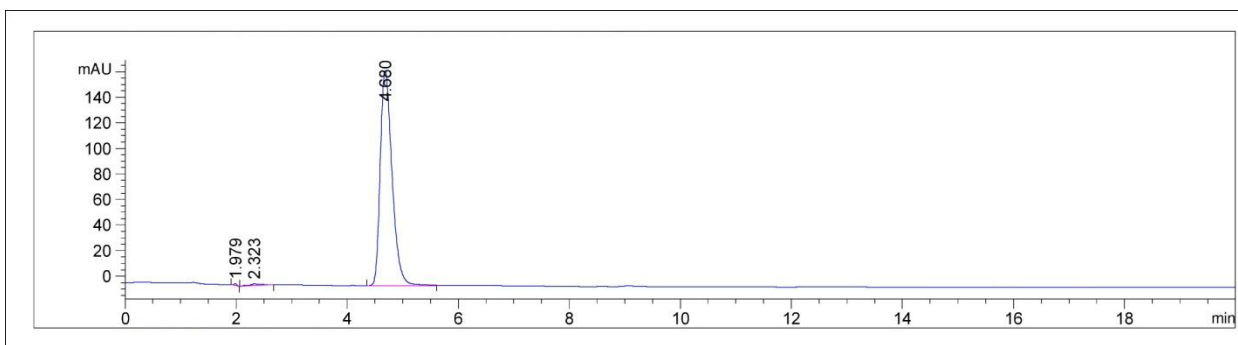

RP-HPLC Chromatogram of 2d

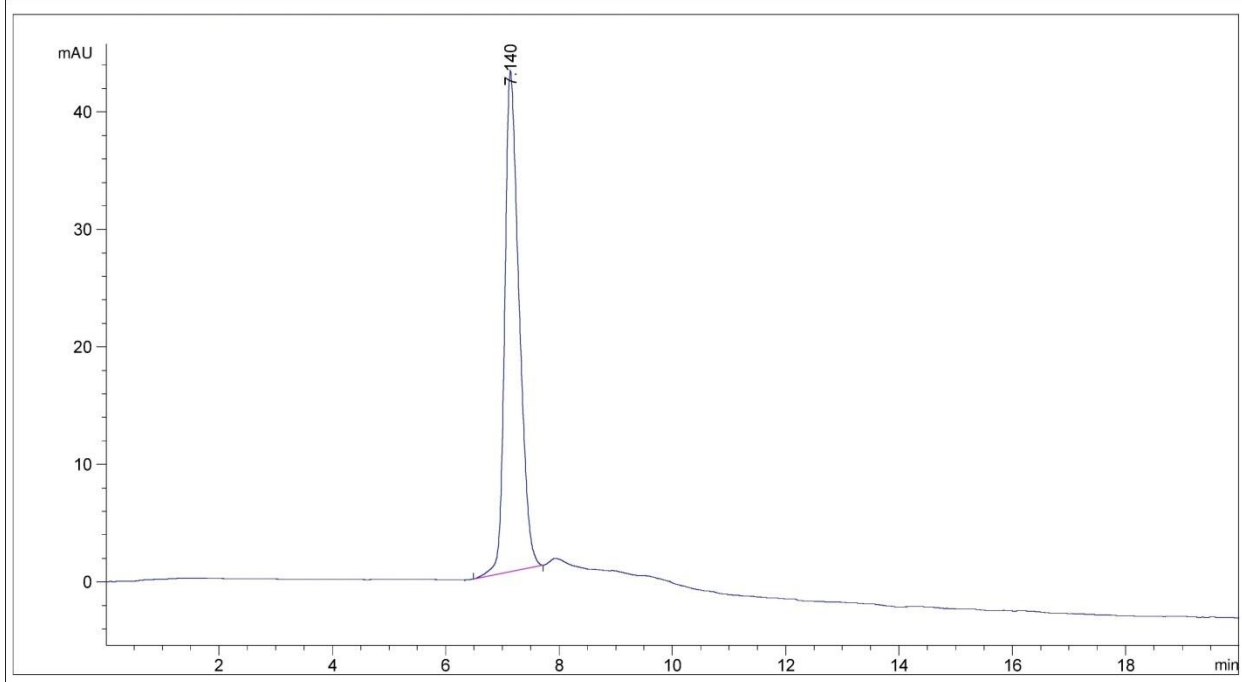

RP-HPLC Chromatogram of 2e

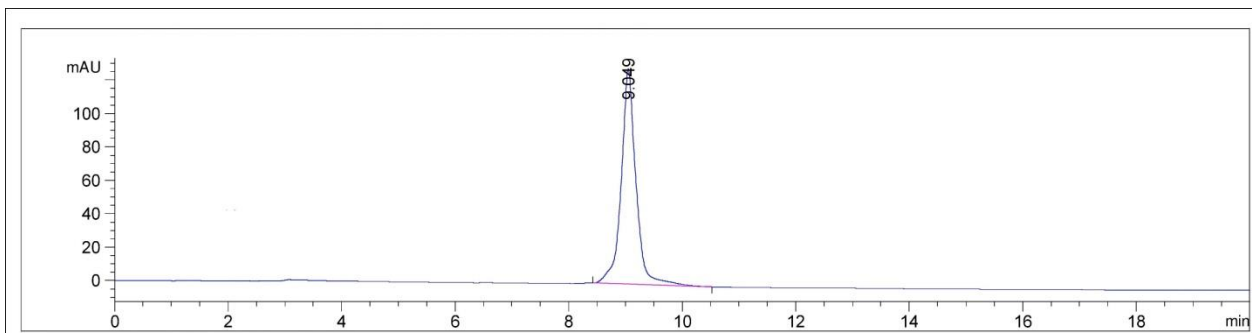

RP-HPLC Chromatogram of 2f

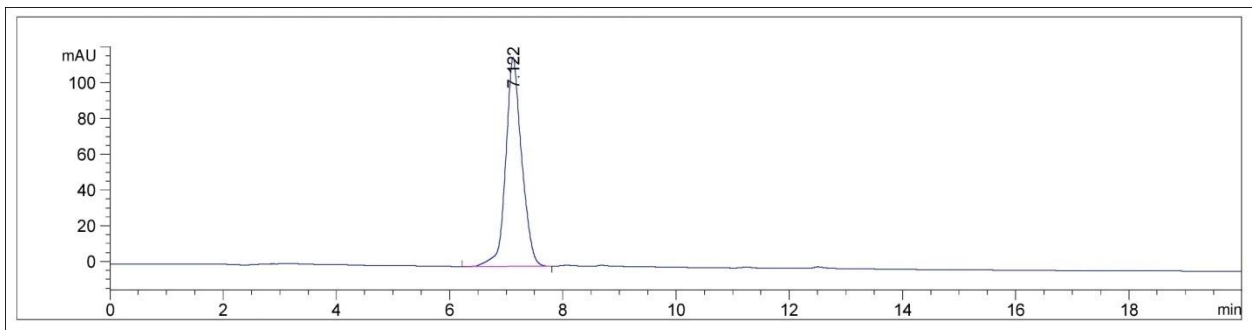

RP-HPLC Chromatogram of 2g

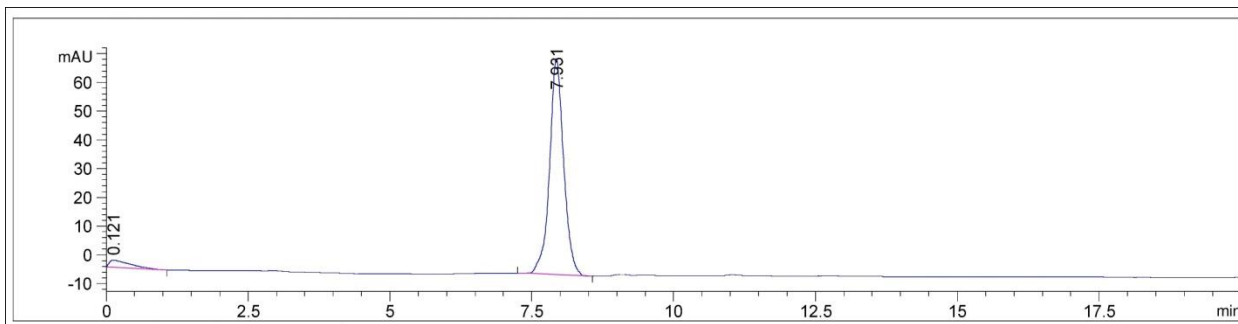

RP-HPLC Chromatogram of 2h

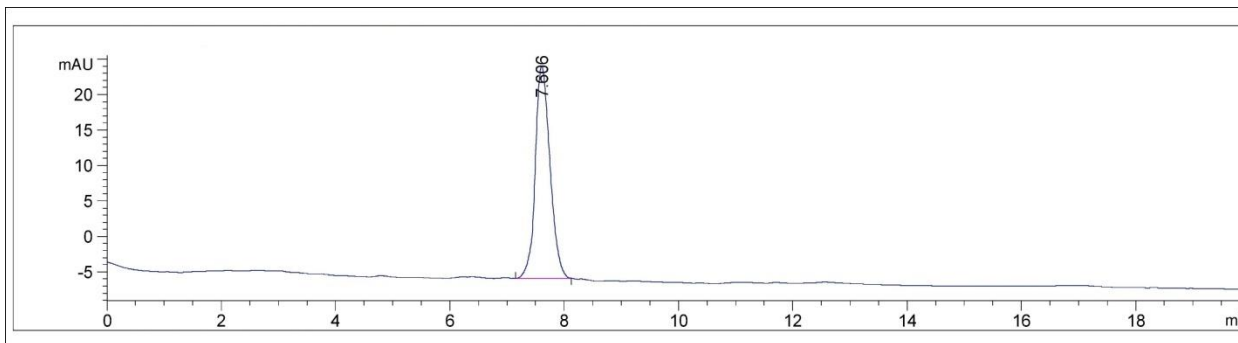

RP-HPLC Chromatogram of 2i

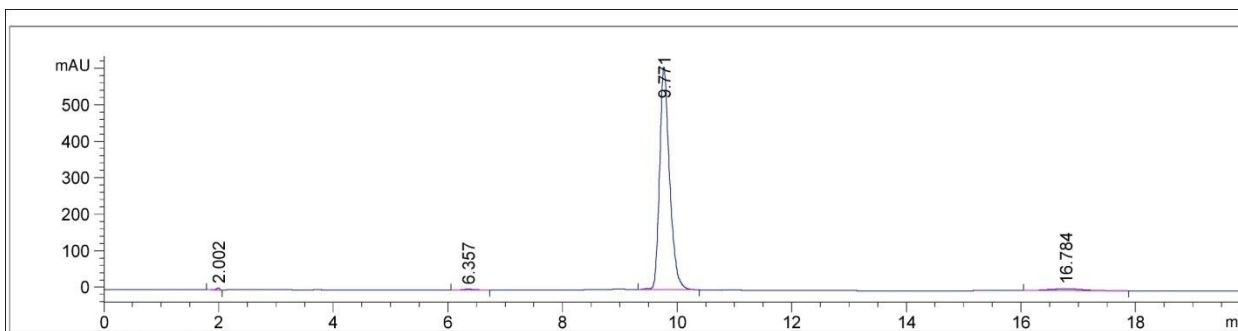

RP-HPLC Chromatogram of 2j

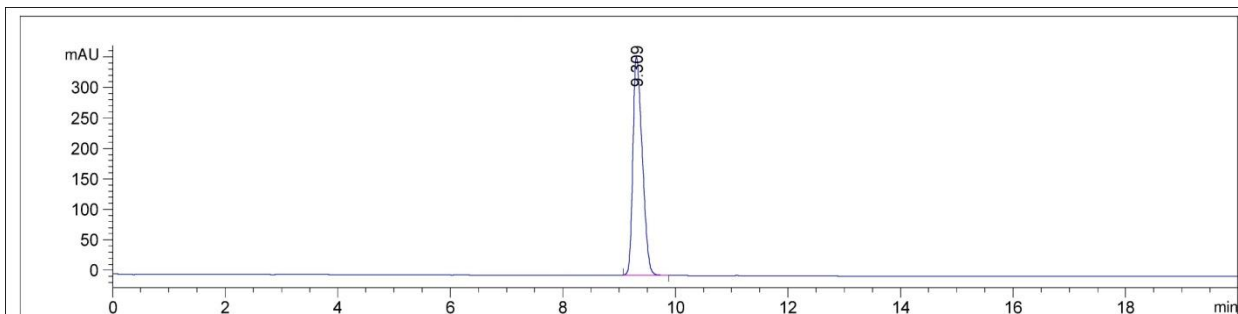

RP-HPLC Chromatogram of 2k



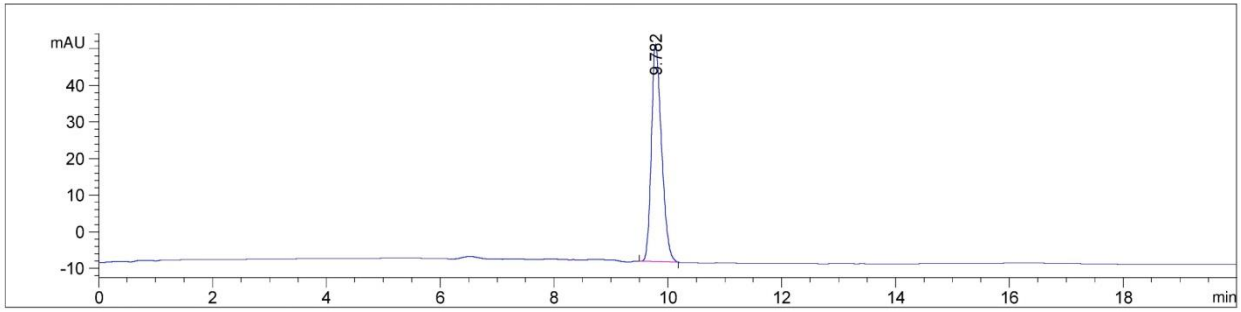

RP-HPLC Chromatogram of 2l

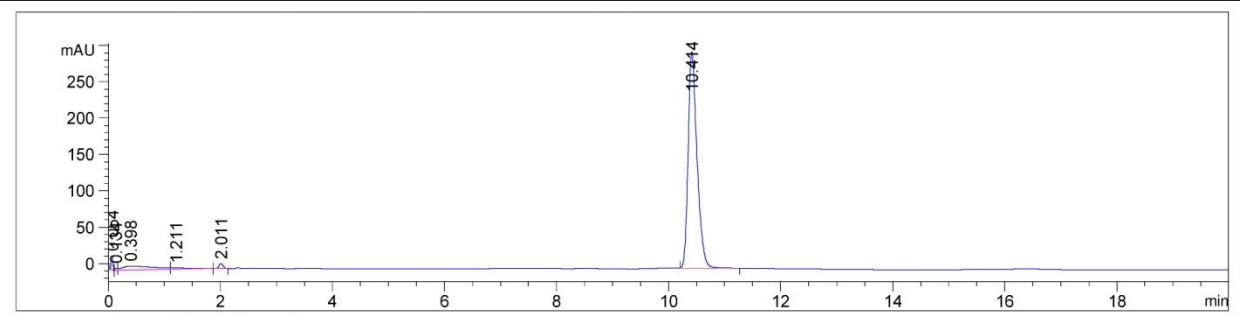

RP-HPLC Chromatogram of 2m

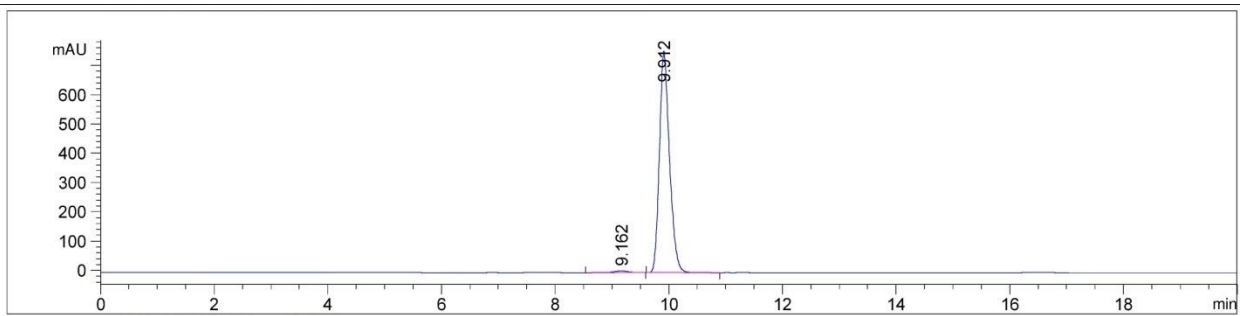

RP-HPLC Chromatogram of 2n

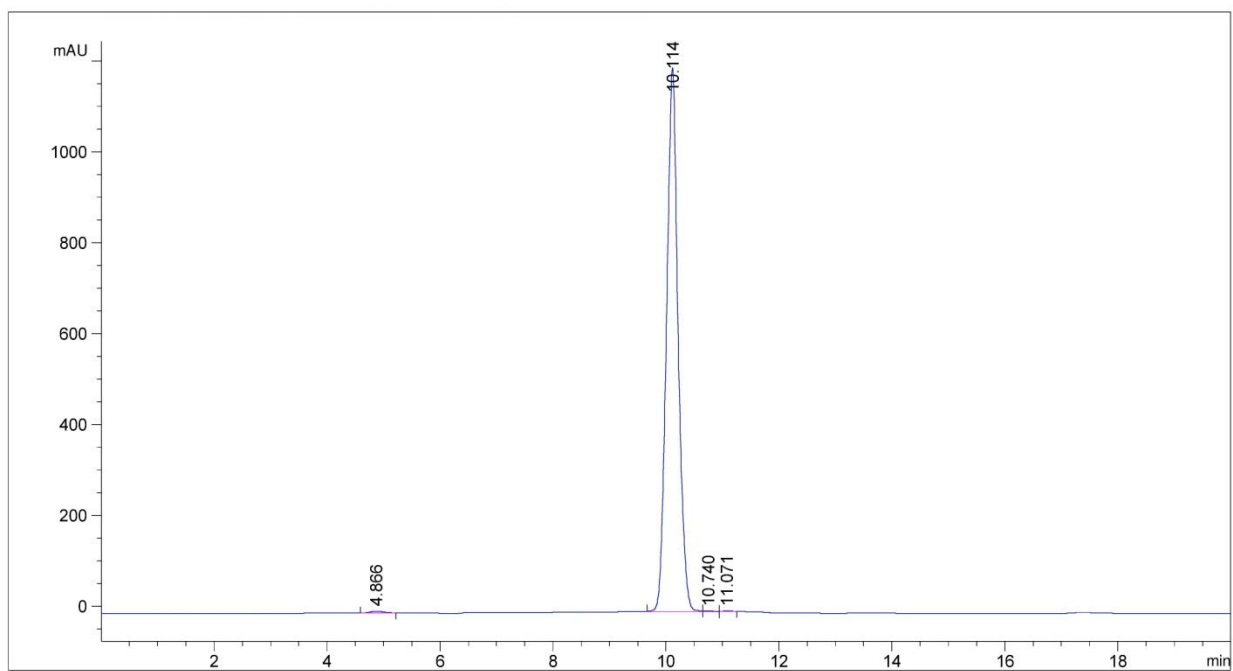

RP-HPLC Chromatogram of 2o

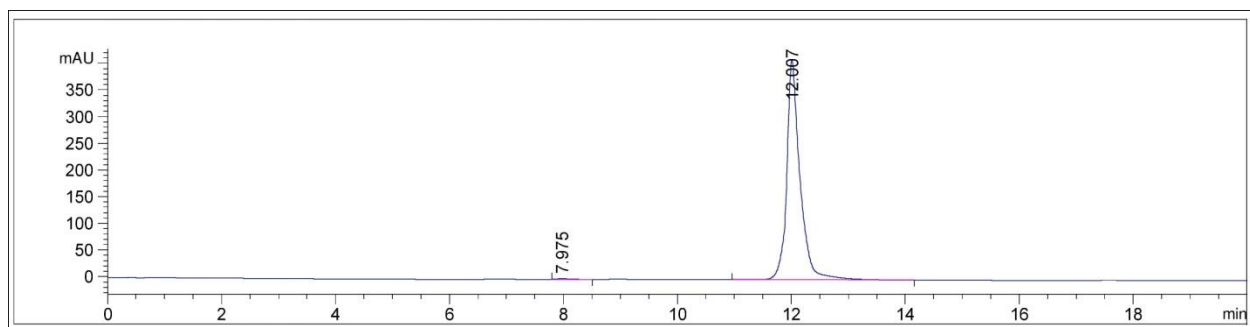

RP-HPLC Chromatogram of 2p

RP-HPLC profiles of 2a-p (method: gradient 0.1% TFA water-acetonitrile (0-100%) in 20 min; VWD at  $\lambda = 254$  nm; flow rate: 1.0 mL/min; column: Agilent Eclipse, XDB-C18, pore size-5  $\mu\text{m}$ , diameter x length = 4.6 x 150 mm).
